# Supplementary material for: Host tRNA-Derived RNAs Target the 3′Untranslated Region of SARS-CoV-2
Source: MDPI journal article supplement (doi:10.3390/pathogens11121479), 2022-12-06
Supplement: s1 [file s1]

Homology to human tRNAs using tDRnamer  
<http://trna.ucsc.edu/tDRnamer/index.html>

tDR-Gly GCGTTGGTGGTATAGTGGTGAGCATAGCTG

#### tDR-1:30-Gly-TCC-2 (tRF-Gly)

|                         |                                                                          |
|-------------------------|--------------------------------------------------------------------------|
| Organism                | Homo sapiens (hg38 - GRCh38 Dec 2013)                                    |
| tDR name ⓘ              | tDR-1:30-Gly-TCC-2                                                       |
| tDR sequence            | <div>..... ..... ..... </div> <div>5' GCGUUGGUGGUAGUGGUGAGCAUAGCUG</div> |
| tDR sequence length     | 30                                                                       |
| Sprinzl Position ⓘ      | 1 to 30 (Acceptor stem to Anticodon stem)                                |
| Source tRNA             | <a href="#">tRNA-Gly-TCC-2</a>                                           |
| Source type             | mature tRNA                                                              |
| Isotype                 | Gly                                                                      |
| Anticodon               | TCC                                                                      |
| # of mapped isodecoders | 1                                                                        |
| # of mismatches         | 0                                                                        |
| # of indels             | 0                                                                        |

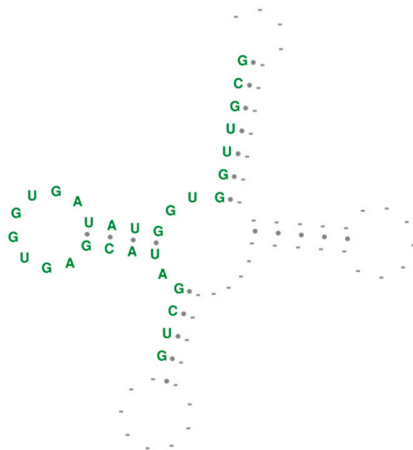

The alignment of the tDR-Gly to tRNA-Gly.

tDR-Val GTTTCCGTAGTGTAGTGGTTATCACGTTTCGC

tDR-1:31-Val-AAC-1-M6 (tRF-Val)

|                         |                                                                                                                           |
|-------------------------|---------------------------------------------------------------------------------------------------------------------------|
| Organism                | Homo sapiens (hg38 - GRCh38 Dec 2013)                                                                                     |
| tDR name ⓘ              | tDR-1:31-Val-AAC-1-M6                                                                                                     |
| Synonyms                | tDR-1:31-Val-AAC-3-M6<br>tDR-1:31-Val-AAC-4-M6<br>tDR-1:31-Val-CAC-1-M6<br>tDR-1:31-Val-CAC-4-M6<br>tDR-1:31-Val-CAC-5-M6 |
| tDR sequence            | 5' <span>GUUUCCGUAGUGUAGUGGUUAUCACGUUCGC</span>                                                                           |
| tDR sequence length     | 31                                                                                                                        |
| Sprinzl Position ⓘ      | 1 to 31 (Acceptor stem to Anticodon stem)                                                                                 |
| Source tRNAs            | tRNA-Val-AAC-1<br>tRNA-Val-AAC-3<br>tRNA-Val-AAC-4<br>tRNA-Val-CAC-1<br>tRNA-Val-CAC-4<br>tRNA-Val-CAC-5                  |
| Source type             | mature tRNA                                                                                                               |
| Isotype                 | Val                                                                                                                       |
| Anticodon               | CAC, AAC                                                                                                                  |
| # of mapped isodecoders | 6                                                                                                                         |
| # of mismatches         | 0                                                                                                                         |
| # of indels             | 0                                                                                                                         |

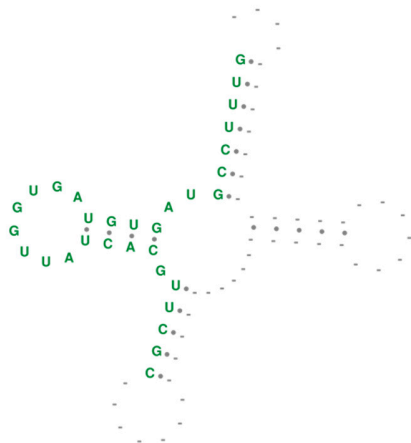

The alignment of the tDR-Val to tRNA-Val.
