# Supplementary material for: Host tRNA-Derived RNAs Target the 3′Untranslated Region of SARS-CoV-2
Source: MDPI journal article supplement (doi:10.3390/pathogens11121479), 2022-12-06
Supplement: s1 [file s1]

RNAhybrid checked on 6-28-22

[https://bibiserv.cebitec.uni-](https://bibiserv.cebitec.uni-bielefeld.de/rnahybrid?viewType=submission&subType=rnahybrid_function_rnahybrid_p_1)

[bielefeld.de/rnahybrid?viewType=submission&subType=rnahybrid\\_function\\_rnahybrid\\_p\\_1](https://bibiserv.cebitec.uni-bielefeld.de/rnahybrid?viewType=submission&subType=rnahybrid_function_rnahybrid_p_1)

for tDR-Gly (5'- GCGTTGGTGGTATAGTGGTGAGCATAGCTG)

for tDR-Val (5'-GTTTCCGTAGTGTAGTGGTTATCACGTTTCGC

The reference sequence Reference (NC\_045512.2)

### Index Sequence top 25 tDR-Val

Version: RNAhybrid 2.2

Command line: /vol/bioapps/bin/RNAhybrid.bin -t

/var/bibiserv2/anonymous/rnahybrid/28/15/08/bibiserv2\_2022-06-

28\_150830\_318kK/rnahybrid\_input\_target\_rna\_sequences.file -s 3utr\_human -q

/var/bibiserv2/anonymous/rnahybrid/28/15/08/bibiserv2\_2022-06-

28\_150830\_318kK/rnahybrid\_input\_mirna\_sequences.file -b 25 -n 31 -m 29903

searching

dataset: 1

mde of 5027: -64.200005

Individual hits

-----

dataset: 1

target: NC\_045512.2

length: 29903

miRNA : 5027

length: 31

mfe: -31.0 kcal/mol

p-value: 1.000000e+00

position 6158

target 5' G GAUUAUAA A 3'

GUG AUGUGGUGGCUAUU ACACUAC

CGC UGCACUAUUGGUGA UGUGAUG

miRNA 3' U CCUUUG 5'

-----

dataset: 1

target: NC\_045512.2

length: 29903

miRNA : 5027

length: 31

mfe: -30.9 kcal/mol

p-value: 1.000000e+00

position 29704

target 5' A U AAG C UUCACCGAGGCCAC U G 3'

GGAC UGA AGCCAC ACAUU GCGGAG AC

CUUG ACU UUGGUG UGUGA UGCCUU UG  
miRNA 3' CG C A A 5'

dataset: 1  
target: NC\_045512.2  
length: 29903  
miRNA : 5027  
length: 31

mfe: -30.5 kcal/mol  
p-value: 1.000000e+00

position 5507  
target 5' U UGUAAA UG G A A C A 3'  
UGAACGUGGUG ACU UG AC AC G AGAC  
GCUUGCACUAU UGG AU UG UG C UUUG  
miRNA 3' C UG G A C 5'

dataset: 1  
target: NC\_045512.2  
length: 29903  
miRNA : 5027  
length: 31

mfe: -30.0 kcal/mol  
p-value: 1.000000e+00

position 6453  
target 5' A U A CGAAG UG A 3'  
GUG AAUGUGA AACUAC U UA GGAGAC  
CGC UUGCACU UUGGUG G AU CCUUUG  
miRNA 3' A AU UG G 5'

dataset: 1  
target: NC\_045512.2  
length: 29903  
miRNA : 5027  
length: 31

mfe: -29.9 kcal/mol  
p-value: 1.000000e+00

position 29253  
target 5' C G U A U C 3'  
G GAACGUGG UGACC UACAC GG GC  
C CUUGCACU AUUGG AUGUG CC UG  
miRNA 3' G UG AUG UU 5'

dataset: 1

target: NC\_045512.2  
length: 29903  
miRNA : 5027  
length: 31

mfe: -29.6 kcal/mol  
p-value: 1.000000e+00

position 12237  
target 5' U C CA GCA GUAAGU A 3'  
UGA CGUGAUG GCCAU AC UGGAAA  
GCU GCACUAU UGGUG UG GCCUUU  
miRNA 3' C U AUG AU G 5'

dataset: 1  
target: NC\_045512.2  
length: 29903  
miRNA : 5027  
length: 31

mfe: -29.3 kcal/mol  
p-value: 1.000000e+00

position 10117  
target 5' U CA UA UCUUU U 3'  
UGUGGUA ACUACACU ACGG GGC  
GCACUAU UGAUGUGA UGCC UUG  
miRNA 3' CGCUU UGG U 5'

dataset: 1  
target: NC\_045512.2  
length: 29903  
miRNA : 5027  
length: 31

mfe: -29.2 kcal/mol  
p-value: 1.000000e+00

position 10668  
target 5' U U UGUA UG UAUAA A 3'  
AGC UGGU CGCUGC U AUGGAGAC  
UUG ACUA GUGAUG A UGCCUUUG  
miRNA 3' CGC C UUG UG 5'

dataset: 1  
target: NC\_045512.2  
length: 29903  
miRNA : 5027  
length: 31

mfe: -29.0 kcal/mol

p-value: 1.000000e+00

position 1457  
target 5' C A G CGC UU U 3'  
GU AG GUGGU ACUAUUGC CU GGAGGC  
CG UU CACUA UGGUGAUG GA CCUUUG  
miRNA 3' C G U U UG 5'

---

dataset: 1  
target: NC\_045512.2  
length: 29903  
miRNA : 5027  
length: 31

mfe: -29.0 kcal/mol  
p-value: 1.000000e+00

position 8780  
target 5' A C GG AG AU CAA U 3'  
GC AGCGUGGU U UUAUACUA GA AGC  
CG UUGCACUA G GAUGUGAU CU UUG  
miRNA 3' C UU GU GC 5'

---

dataset: 1  
target: NC\_045512.2  
length: 29903  
miRNA : 5027  
length: 31

mfe: -29.0 kcal/mol  
p-value: 1.000000e+00

position 29096  
target 5' G A GA AACCCAA U 3'  
GC GACGUGGU CCA ACA GGAAAU  
CG UUGCACUA GGU UGU CCUUUG  
miRNA 3' C UU GA GAUG 5'

---

dataset: 1  
target: NC\_045512.2  
length: 29903  
miRNA : 5027  
length: 31

mfe: -28.7 kcal/mol  
p-value: 1.000000e+00

position 6366  
target 5' A G A C 3'  
G GAAUG GAUAAUC UUGC CUGCG AGAU  
C CUUGC CUAUUGG GAUG GAUGC UUUG

miRNA 3' G A U U C 5'

dataset: 1  
target: NC\_045512.2  
length: 29903  
miRNA : 5027  
length: 31  
  
mfe: -28.6 kcal/mol  
p-value: 1.000000e+00

position 4158  
target 5' C UAU U AAAAAGGCUGGUG U G 3'  
UGUGGU ACC ACU GCACUAC GAAAU  
GCACUA UGG UGA UGUGAUG CUUUG  
miRNA 3' CGCUU U C 5'

dataset: 1  
target: NC\_045512.2  
length: 29903  
miRNA : 5027  
length: 31  
  
mfe: -28.4 kcal/mol  
p-value: 1.000000e+00

position 27073  
target 5' C UAGCAG CAGGUUUU AUACAGUC A UU A 3'  
GC AGCGUG GUGACU GCUGC GCUAC GGA GGC  
CG UUGCAC UAUUGG UGAUG UGAUG CCU UUG  
miRNA 3' C 5'

dataset: 1  
target: NC\_045512.2  
length: 29903  
miRNA : 5027  
length: 31  
  
mfe: -28.0 kcal/mol  
p-value: 1.000000e+00

position 2246  
target 5' G AAAU UC UG AA U 3'  
GUGGAC UG ACC UGCA GGAAAU  
CGCUUG AC UGG AUGU CCUUUG  
miRNA 3' C UAU UG GAUG 5'

dataset: 1  
target: NC\_045512.2

length: 29903  
miRNA : 5027  
length: 31

mfe: -27.8 kcal/mol  
p-value: 1.000000e+00

position 8700  
target 5' U UG CGUGACAU A U U 3'  
UGA GUGGUG UCACU GCA CUAC GA AC  
GCU CACUAU GGUGA UGU GAUG CU UG  
miRNA 3' C UG U C U 5'

---

dataset: 1  
target: NC\_045512.2  
length: 29903  
miRNA : 5027  
length: 31

mfe: -27.7 kcal/mol  
p-value: 1.000000e+00

position 653  
target 5' G A C 3'  
GAGC UGGUGGCCAU GUUACGG  
CUUG ACUAUUGGUG UGAUGCC  
miRNA 3' CG C AUG UUUG 5'

---

dataset: 1  
target: NC\_045512.2  
length: 29903  
miRNA : 5027  
length: 31

mfe: -27.7 kcal/mol  
p-value: 1.000000e+00

position 28592  
target 5' A UG UU C 3'  
GA GU AU CUACUAC CUA GGAA  
CU CA UA GGUGAUG GAU CCUU  
miRNA 3' CG UG C UU U G UG 5'

---

dataset: 1  
target: NC\_045512.2  
length: 29903  
miRNA : 5027  
length: 31

mfe: -27.7 kcal/mol  
p-value: 1.000000e+00

position 17157  
target 5' A UU UCUCAU GUUGAU U A 3'  
GC GC GCCGCU GCACUAUG GAGA  
CG UG UGGUGA UGUGAUGC CUUU  
miRNA 3' CU CACUAU G 5'

-----  
dataset: 1  
target: NC\_045512.2  
length: 29903  
miRNA : 5027  
length: 31

mfe: -27.7 kcal/mol  
p-value: 1.000000e+00

position 19843  
target 5' U GG ACAUU A UGAUC CU A 3'  
UG UGUGG GCUGCU AUACUG UGGGA AC  
GC GCACU UGGUGA UGUGAU GCCUU UG  
miRNA 3' C UU AU 5'

-----  
dataset: 1  
target: NC\_045512.2  
length: 29903  
miRNA : 5027  
length: 31

mfe: -27.7 kcal/mol  
p-value: 1.000000e+00

position 776  
target 5' C ACUCAU GCU GGAGGGGCAUA UC A 3'  
GUGA GCGUGA UAAC CACU CGCUAUG GAU  
CGCU UGCACU AUUG GUGA GUGAUGC UUG  
miRNA 3' U CU 5'

-----  
dataset: 1  
target: NC\_045512.2  
length: 29903  
miRNA : 5027  
length: 31

mfe: -27.6 kcal/mol  
p-value: 1.000000e+00

position 25931  
target 5' C A CU GAUUGGUGG GAAAA C 3'  
UGAAC UGA ACCA UUAUACU AUGGGAAU  
GCUUG ACU UGGU GAUGUGA UGCCUUUG  
miRNA 3' C C AU 5'

-----  
dataset: 1  
target: NC\_045512.2  
length: 29903  
miRNA : 5027  
length: 31

mfe: -27.4 kcal/mol  
p-value: 1.000000e+00

position 3519  
target 5' U C AUA UAAU C 3'  
UGAAU UGAUGAUUAC GCUAC GGA  
GCUUG ACUAUUGGUG UGAUG CCU  
miRNA 3' C C AUG UUG 5'

-----  
dataset: 1  
target: NC\_045512.2  
length: 29903  
miRNA : 5027  
length: 31

mfe: -27.4 kcal/mol  
p-value: 1.000000e+00

position 4590  
target 5' A ACUCU UACAAU UG U A 3'  
UGAA UGU GCCACU GCUAUG AAC  
GCUU GCA UGGUGA UGAUGC UUG  
miRNA 3' C CUAU UG CU 5'

-----  
dataset: 1  
target: NC\_045512.2  
length: 29903  
miRNA : 5027  
length: 31

mfe: -27.3 kcal/mol  
p-value: 1.000000e+00

position 335  
target 5' C CUCG GUG UU U 3'  
GCG ACGUG UAC GCU GGAGAC  
CGC UGCAC GUG UGA CCUUUG  
miRNA 3' U UAUUG AUG UG 5'



## Index sequence top 25 tDR-Gly

Version: RNAhybrid 2.2

Command line: /vol/bioapps/bin/RNAhybrid.bin -m 29903 -n 30 -t  
/var/bibiserv2/anonymous/rnahybrid/28/15/46/bibiserv2\_2022-06-  
28\_154601\_KSR7p/rnahybrid\_input\_target\_rna\_sequences\_.file -b 25 -q  
/var/bibiserv2/anonymous/rnahybrid/28/15/46/bibiserv2\_2022-06-  
28\_154601\_KSR7p/rnahybrid\_input\_mirna\_sequences.file -s 3utr\_human  
searching

dataset: 1

mde of 5008c: -65.000008

Individual hits

dataset: 1

target: NC\_045512.2

length: 29903

miRNA : 5008c

length: 30

mfe: -35.7 kcal/mol

p-value: 1.000000e+00

position 1486

target 5' A GUUCUCUUAUGUUGG AACAAG UAUUGGGUCCACGU U  
3'

GGCUGUGU

UUGCCAU

UGUGCC

GCUAGCGC

UCGAUACG

AGUGGUG

AUAUGG

UGGUUGCG

miRNA 3' G

5'

dataset: 1

target: NC\_045512.2

length: 29903

miRNA : 5008c

length: 30

mfe: -35.3 kcal/mol

p-value: 1.000000e+00

position 10397

target 5' U UGUUACAAUG U GUGU G 3'

UAGCU

GUUCACCA CUG

UUACCAAUGU

GUCGA

CGAGUGGU GAU

GGUGGUUGCG

miRNA 3'

UA

AU

5'

dataset: 1

target: NC\_045512.2

length: 29903

miRNA : 5008c

length: 30

mfe: -35.2 kcal/mol  
p-value: 1.000000e+00

position 17155  
target 5' A GUU A 3'  
CAGCU UGCUC UCAU GCCGCU GAUGC  
GUCCA ACGAG GGUG UGGUGG UUGCG  
miRNA 3' U U AUA 5'

---

dataset: 1  
target: NC\_045512.2  
length: 29903  
miRNA : 5008c  
length: 30

mfe: -33.0 kcal/mol  
p-value: 1.000000e+00

position 14574  
target 5' U A UCUGGUAUUC GAUAA A 3'  
GCUAUGC CGCUGCU UAUUACUA ACGC  
CGAUACG GUGGUGA AUGGUGGU UGCG  
miRNA 3' GU A U 5'

---

dataset: 1  
target: NC\_045512.2  
length: 29903  
miRNA : 5008c  
length: 30

mfe: -32.9 kcal/mol  
p-value: 1.000000e+00

position 13760  
target 5' A GAC G A GU C 3'  
CGGU AUG UACCAC UAUAUCAC CAACGU  
GUCC UAC GUGGUG AUAUGGUG GUUGCG  
miRNA 3' A GA 5'

---

dataset: 1  
target: NC\_045512.2  
length: 29903  
miRNA : 5008c  
length: 30

mfe: -32.7 kcal/mol  
p-value: 1.000000e+00

position 17433  
target 5' U GACCC AU UG CC A 3'  
GGC UGCUCA UACC CA ACGC

UCG ACGAGU AUGG GU UGCG  
miRNA 3' G AU GGUGAU UG 5'

dataset: 1  
target: NC\_045512.2  
length: 29903  
miRNA : 5008c  
length: 30

mfe: -32.5 kcal/mol  
p-value: 1.000000e+00

position 28420  
target 5' U GUCUUG CUC U A UG A 3'  
GC GUUCACCGCU AC CA CA GC  
CG CGAGUGGUGA UG GU GU CG  
miRNA 3' GU AUA UA G UG 5'

dataset: 1  
target: NC\_045512.2  
length: 29903  
miRNA : 5008c  
length: 30

mfe: -32.4 kcal/mol  
p-value: 1.000000e+00

position 29506  
target 5' G A G CAACUCAGGCCUAA CAUGCAG A G A 3'  
AGC GUGCU ACU ACU ACCAC CAA GC  
UCG UACGA UGG UGA UGGUG GUU CG  
miRNA 3' G A G UA G 5'

dataset: 1  
target: NC\_045512.2  
length: 29903  
miRNA : 5008c  
length: 30

mfe: -32.3 kcal/mol  
p-value: 1.000000e+00

position 26706  
target 5' U UGUUUU UU AGAAUAAAUUGGAU GG G 3'  
UAGCU GUGCUUGCUGCUGU AC CACC UG  
GUCGA UACGAGUGGUGAUA UG GUGG GC  
miRNA 3' UU G 5'

dataset: 1

target: NC\_045512.2  
length: 29903  
miRNA : 5008c  
length: 30

mfe: -32.3 kcal/mol  
p-value: 1.000000e+00

position 24226  
target 5' U GCAG G AA UGCU A 3'  
GGU GUGCU CAUUAU AUACCAU AUGC  
UCG UACGA GUGGUG UAUGGUG UGCG  
miRNA 3' G A A U 5'

dataset: 1  
target: NC\_045512.2  
length: 29903  
miRNA : 5008c  
length: 30

mfe: -32.0 kcal/mol  
p-value: 1.000000e+00

position 4679  
target 5' C CAGUUUC UUCU UG GUUA A 3'  
CAGCUA UGU UCACC AUGCU CAGCGU  
GUCGAU ACG AGUGG UAUGG GUUGCG  
miRNA 3' UGA UG 5'

dataset: 1  
target: NC\_045512.2  
length: 29903  
miRNA : 5008c  
length: 30

mfe: -32.0 kcal/mol  
p-value: 1.000000e+00

position 26800  
target 5' U CUUCAU UUCAG U UG GU G 3'  
CAGCUA UGCUU CU ACUG U CGC ACGC  
GUCGAU ACGAG GG UGAU A GUG UGCG  
miRNA 3' U UG GU 5'

dataset: 1  
target: NC\_045512.2  
length: 29903  
miRNA : 5008c  
length: 30

mfe: -31.7 kcal/mol

p-value: 1.000000e+00

position 16927  
target 5' A A CAUUAAGUG UAC G AAGA A 3'  
CAGU AUGC CACC ACUA UGCCAC GC  
GU CG UACG GUGG UGAU AUGGUG CG  
miRNA 3' A A GUUG 5'

---

dataset: 1  
target: NC\_045512.2  
length: 29903  
miRNA : 5008c  
length: 30

mfe: -31.7 kcal/mol  
p-value: 1.000000e+00

position 4179  
target 5' A GG AAA A 3'  
GGCUG GU CACUACUG UGCUAGCG  
UCGAU CG GUGGUGAU GUGGUUGC  
miRNA 3' G A A AUG G 5'

---

dataset: 1  
target: NC\_045512.2  
length: 29903  
miRNA : 5008c  
length: 30

mfe: -31.6 kcal/mol  
p-value: 1.000000e+00

position 1317  
target 5' A AAG UGUGGUUACU AA U 3'  
AG GUGC CACUACU UACC CCA AUGC  
UC UACG GUGGUGA AUGG GGU UGCG  
miRNA 3' G GA A U U 5'

---

dataset: 1  
target: NC\_045512.2  
length: 29903  
miRNA : 5008c  
length: 30

mfe: -31.6 kcal/mol  
p-value: 1.000000e+00

position 29174  
target 5' U C AAA UG AAUU C U 3'  
GGC GC U CAC UGCC CCAGCGC  
UCG CG G GUG AUGG GGUUGCG

miRNA 3' G AUA A UG AU U 5'

dataset: 1  
target: NC\_045512.2  
length: 29903  
miRNA : 5008c  
length: 30  
  
mfe: -31.5 kcal/mol  
p-value: 1.000000e+00

position 26994  
target 5' C UGACAUCAAGGACC CUAAGAAA GUU C G U 3'  
GCUG UGC UCACU GCUA AUCAC AACGC  
CGAU ACG AGUGG UGAU UGGUG UUGCG  
miRNA 3' GU A G 5'

dataset: 1  
target: NC\_045512.2  
length: 29903  
miRNA : 5008c  
length: 30  
  
mfe: -31.5 kcal/mol  
p-value: 1.000000e+00

position 14789  
target 5' U G UA G CGUUAUAAU A 3'  
CAGC AU U ACUACUAU CUACCAAC  
GUCG UA A UGGUGAUA GGUGGUUG  
miRNA 3' A CG G U CG 5'

dataset: 1  
target: NC\_045512.2  
length: 29903  
miRNA : 5008c  
length: 30  
  
mfe: -31.4 kcal/mol  
p-value: 1.000000e+00

position 16205  
target 5' A ACA AGU UAC G U 3'  
GGCUAUGU CACCGC AUAC CU A GC  
UCGAUACG GUGGUG UAUG GG U CG  
miRNA 3' G A A GU U G 5'

dataset: 1  
target: NC\_045512.2

length: 29903  
miRNA : 5008c  
length: 30

mfe: -31.4 kcal/mol  
p-value: 1.000000e+00

position 29716  
target 5'           A           AUUU           G C 3'  
                  GC CACCAC       UCACCGA GC  
                  CG GUGGUG       GGUGGUU CG  
miRNA 3' GUCGAUA A       AUAU       G 5'

---

dataset: 1  
target: NC\_045512.2  
length: 29903  
miRNA : 5008c  
length: 30

mfe: -31.3 kcal/mol  
p-value: 1.000000e+00

position 11107  
target 5' U       GGUA           U       UU A 3'  
          GCUAUG       UUAUUGCUAUG CUGCU UGC  
          CGAUAC       AGUGGUGAUAU GGUGG GCG  
miRNA 3' GU       G                   UU 5'

---

dataset: 1  
target: NC\_045512.2  
length: 29903  
miRNA : 5008c  
length: 30

mfe: -31.2 kcal/mol  
p-value: 1.000000e+00

position 13228  
target 5' U   G    A    UGU GU           U C 3'  
          GGU GUGC UCG   U   CUGUACUGCCG UGC  
          UCG UACG AGU   G   GAUAUGGUGGU GCG  
miRNA 3' G   A                   GU       U 5'

---

dataset: 1  
target: NC\_045512.2  
length: 29903  
miRNA : 5008c  
length: 30

mfe: -31.1 kcal/mol  
p-value: 1.000000e+00

```

position 1178
target 5' C      G      AAUGA      A      AUG      C 3'
      CAGU  UGC UCACCA      AUGC ACCAA  UGC
      GUCG  ACG AGUGGU      UAUG UGGUU  GCG
miRNA 3'      AU      GA      G      5'

```

---

```

dataset: 1
target: NC_045512.2
length: 29903
miRNA : 5008c
length: 30

```

```

mfe: -31.1 kcal/mol
p-value: 1.000000e+00

```

```

position 2865
target 5' A      AAA  A      UG  UG  G  G      U 3'
      AGU  UG GUUCGCC  UGU  UG CA AUGC
      UCG  AU CGAGUGG  AUA  GU GU UGCG
miRNA 3' G      A      UG  UG  G      5'

```

---

```

dataset: 1
target: NC_045512.2
length: 29903
miRNA : 5008c
length: 30

```

```

mfe: -30.9 kcal/mol
p-value: 1.000000e+00

```

```

position 18233
target 5' A      A  G      ACAUGUU      C  A 3'
      AGUU AUG UUACC CUA      UAUCACC GCG
      UCGA UAC AGUGG GAU      AUGGUGG UGC
miRNA 3' G      G      U      U      G 5'

```

---

Alpha tDR-Val

Version: RNAhybrid 2.2



Command line:/vol/bioapps/bin/RNAhybrid.bin -s 3utr\_human -t  
/var/bibiserv2/anonymous/rnahybrid/28/15/15/bibiserv2\_2022-06-  
28\_151531\_1DZ1c/rnahybrid\_input\_target\_rna\_sequences.file -m 29851 -q  
/var/bibiserv2/anonymous/rnahybrid/28/15/15/bibiserv2\_2022-06-  
28\_151531\_1DZ1c/rnahybrid\_input\_mirna\_sequences.file -b 25 -n 31  
searching  
dataset: 1  
mde of 5027: -64.200005  
Individual hits  
-----

dataset: 1  
target: OV054768.1  
length: 29851  
miRNA : 5027  
length: 31

mfe: -31.0 kcal/mol  
p-value: 1.000000e+00

position 6158  
target 5' G GAUUAUAA A 3'  
GUG AUGUGGUGGCUAUU ACACUAC  
CGC UGCACUAUUGGUGA UGUGAUG  
miRNA 3' U CCUUUG 5'

-----  
dataset: 1  
target: OV054768.1  
length: 29851  
miRNA : 5027  
length: 31

mfe: -30.9 kcal/mol  
p-value: 1.000000e+00

position 29685  
target 5' A U AAG C UUCACCGAGGCCAC U G 3'  
GGAC UGA AGCCAC ACAUU GCGGAG AC  
CUUG ACU UUGGUG UGUGA UGCCUU UG  
miRNA 3' CG C A A 5'

-----  
dataset: 1  
target: OV054768.1  
length: 29851  
miRNA : 5027  
length: 31

mfe: -30.5 kcal/mol  
p-value: 1.000000e+00

position 5507  
target 5' U UGUAAA UG G A A C A 3'  
UGAACGUGGUG ACU UG AC AC G AGAC

miRNA 3' C GCUUGCACUAU UGG AU UG UG C UUUG 5'  
UG G A C

---

dataset: 1  
target: OV054768.1  
length: 29851  
miRNA : 5027  
length: 31

mfe: -30.0 kcal/mol  
p-value: 1.000000e+00

position 6453  
target 5' A U A CGAAG UG A 3'  
GUG AAUGUGA AACUAC U UA GGAGAC  
CGC UUGCACU UUGGUG G AU CCUUUG  
miRNA 3' A AU UG G 5'

---

dataset: 1  
target: OV054768.1  
length: 29851  
miRNA : 5027  
length: 31

mfe: -29.9 kcal/mol  
p-value: 1.000000e+00

position 29234  
target 5' C G U A U C 3'  
G GAACGUGG UGACC UACAC GG GC  
C CUUGCACU AUUGG AUGUG CC UG  
miRNA 3' G UG AUG UU 5'

---

dataset: 1  
target: OV054768.1  
length: 29851  
miRNA : 5027  
length: 31

mfe: -29.6 kcal/mol  
p-value: 1.000000e+00

position 12228  
target 5' U C CA GCA GUAAGU A 3'  
UGA CGUGAUG GCCAU AC UGGAAA  
GCU GCACUAU UGGUG UG GCCUUU  
miRNA 3' C U AUG AU G 5'

---

dataset: 1

target: OV054768.1  
length: 29851  
miRNA : 5027  
length: 31

mfe: -29.3 kcal/mol  
p-value: 1.000000e+00

position 10117  
target 5' U CA UA UCUUU U 3'  
UGUGGUA ACUACACU ACGG GGC  
GCACUAU UGAUGUGA UGCC UUG  
miRNA 3' CGCUU UGG U 5'

dataset: 1  
target: OV054768.1  
length: 29851  
miRNA : 5027  
length: 31

mfe: -29.2 kcal/mol  
p-value: 1.000000e+00

position 10668  
target 5' U U UGUA UG UAUAA A 3'  
AGC UGGU CGCUGC U AUGGAGAC  
UUG ACUA GUGAUG A UGCCUUUG  
miRNA 3' CGC C UUG UG 5'

dataset: 1  
target: OV054768.1  
length: 29851  
miRNA : 5027  
length: 31

mfe: -29.0 kcal/mol  
p-value: 1.000000e+00

position 1457  
target 5' C A G CGC UU U 3'  
GU AG GUGGU ACUAUUGC CU GGAGGC  
CG UU CACUA UGGUGAUG GA CCUUUG  
miRNA 3' C G U U UG 5'

dataset: 1  
target: OV054768.1  
length: 29851  
miRNA : 5027  
length: 31

mfe: -29.0 kcal/mol

p-value: 1.000000e+00

position 8780

```
target 5' A C          GG AG          AU CAA U 3'
          GC AGCGUGGU U UUAUACUA GA AGC
          CG UUGCACUA G GAUGUGAU CU UUG
miRNA 3' C          UU GU          GC          5'
```

dataset: 1

target: OV054768.1

length: 29851

miRNA : 5027

length: 31

mfe: -29.0 kcal/mol

p-value: 1.000000e+00

position 29077

```
target 5' G A          GA AACCCAA U 3'
          GC GACGUGGU CCA ACA          GGAAAU
          CG UUGCACUA GGU UGU          CCUUUG
miRNA 3' C          UU GA GAUG          5'
```

dataset: 1

target: OV054768.1

length: 29851

miRNA : 5027

length: 31

mfe: -28.7 kcal/mol

p-value: 1.000000e+00

position 6366

```
target 5' A G          A C 3'
          G GAAUG GAUAAUC UUGC CUGCG AGAU
          C CUUGC CUAUUGG GAUG GAUGC UUUG
miRNA 3' G A          U U C          5'
```

dataset: 1

target: OV054768.1

length: 29851

miRNA : 5027

length: 31

mfe: -28.6 kcal/mol

p-value: 1.000000e+00

position 4158

```
target 5' C          UAU U AAAAAGGCUGGUG U G 3'
          UGUGGU ACC ACU          GCACUAC GAAAU
          GCACUA UGG UGA          UGUGAUG CUUUG
```

miRNA 3' CGCUU U C 5'

dataset: 1  
target: OV054768.1  
length: 29851  
miRNA : 5027  
length: 31

mfe: -28.4 kcal/mol  
p-value: 1.000000e+00

position 27055  
target 5' C UAGCAG CAGGUUUU AUACAGUC A UU A 3'  
GC AGCGUG GUGACU GCUGC GCUAC GGA GGC  
CG UUGCAC UAUUGG UGAUG UGAUG CCU UUG  
miRNA 3' C 5'

dataset: 1  
target: OV054768.1  
length: 29851  
miRNA : 5027  
length: 31

mfe: -28.0 kcal/mol  
p-value: 1.000000e+00

position 2246  
target 5' G AAAU UC UG AA U 3'  
GUGGAC UG ACC UGCA GGAAAU  
CGCUUG AC UGG AUGU CCUUUG  
miRNA 3' C UAU UG GAUG 5'

dataset: 1  
target: OV054768.1  
length: 29851  
miRNA : 5027  
length: 31

mfe: -27.8 kcal/mol  
p-value: 1.000000e+00

position 8700  
target 5' U UG CGUGACAUU U A U U 3'  
UGA GUGGUG UCACU GCA CUAC GA AC  
GCU CACUAU GGUGA UGU GAUG CU UG  
miRNA 3' C UG U C U 5'

dataset: 1  
target: OV054768.1

length: 29851  
miRNA : 5027  
length: 31

mfe: -27.7 kcal/mol  
p-value: 1.000000e+00

position 653  
target 5' G A C 3'  
GAGC UGGUGGCCAU GUUACGG  
CUUG ACUAUUGGUG UGAUGCC  
miRNA 3' CG C AUG UUUG 5'

---

dataset: 1  
target: OV054768.1  
length: 29851  
miRNA : 5027  
length: 31

mfe: -27.7 kcal/mol  
p-value: 1.000000e+00

position 28573  
target 5' A UG UU C 3'  
GA GU AU CUACUAC CUA GGAA  
CU CA UA GGUGAUG GAU CCUU  
miRNA 3' CG UG C UU U G UG 5'

---

dataset: 1  
target: OV054768.1  
length: 29851  
miRNA : 5027  
length: 31

mfe: -27.7 kcal/mol  
p-value: 1.000000e+00

position 17148  
target 5' A UU UCUCAU GUUGAU U A 3'  
GC GC GCCGCU GCACUAUG GAGA  
CG UG UGGUGA UGUGAUGC CUUU  
miRNA 3' CU CACUAU G 5'

---

dataset: 1  
target: OV054768.1  
length: 29851  
miRNA : 5027  
length: 31

mfe: -27.7 kcal/mol  
p-value: 1.000000e+00

position 19834  
target 5' U GG ACAUU A UGAUC CU A 3'  
UG UGUGG GCUGCU AUACUG UGGGA AC  
GC GCACU UGGUGA UGUGAU GCCUU UG  
miRNA 3' C UU AU 5'

-----  
dataset: 1  
target: OV054768.1  
length: 29851  
miRNA : 5027  
length: 31

mfe: -27.7 kcal/mol  
p-value: 1.000000e+00

position 776  
target 5' C ACUCAU GCU GGAGGGGCAUA UC A 3'  
GUGA GCGUGA UAAC CACU CGCUAUG GAU  
CGCU UGCACU AUUG GUGA GUGAUGC UUG  
miRNA 3' U CU 5'

-----  
dataset: 1  
target: OV054768.1  
length: 29851  
miRNA : 5027  
length: 31

mfe: -27.6 kcal/mol  
p-value: 1.000000e+00

position 25913  
target 5' C A CU GAUUGGUGG GAAAA C 3'  
UGAAC UGA ACCA UUAUACU AUGGGAAU  
GCUUG ACU UGGU GAUGUGA UGCCUUUG  
miRNA 3' C C AU 5'

-----  
dataset: 1  
target: OV054768.1  
length: 29851  
miRNA : 5027  
length: 31

mfe: -27.4 kcal/mol  
p-value: 1.000000e+00

position 3519  
target 5' U C AUA UAAU C 3'  
UGAAU UGAUGAUUAC GCUAC GGA  
GCUUG ACUAUUGGUG UGAUG CCU  
miRNA 3' C C AUG UUG 5'

-----  
dataset: 1  
target: OV054768.1  
length: 29851  
miRNA : 5027  
length: 31

mfe: -27.4 kcal/mol  
p-value: 1.000000e+00

position 4590  
target 5' A ACUCU UACAAU UG U A 3'  
UGAA UGU GCCACU GCUAUG AAC  
GCUU GCA UGGUGA UGAUGC UUG  
miRNA 3' C CUAU UG CU 5'

-----  
dataset: 1  
target: OV054768.1  
length: 29851  
miRNA : 5027  
length: 31

mfe: -27.3 kcal/mol  
p-value: 1.000000e+00

position 335  
target 5' C CUCG GUG UU U 3'  
GCG ACGUG UAC GCU GGAGAC  
CGC UGCAC GUG UGA CCUUUG  
miRNA 3' U UAUUG AUG UG 5'

---

### Alpha top 25 tDR-Gly

Version: RNAhybrid 2.2

Command line: /vol/bioapps/bin/RNAhybrid.bin -n 30 -s 3utr\_human -b 25 -t  
/var/bibiserv2/anonymous/rnahybrid/28/15/33/bibiserv2\_2022-06-  
28\_153336\_fkmK8/rnahybrid\_input\_target\_rna\_sequences.file -q  
/var/bibiserv2/anonymous/rnahybrid/28/15/33/bibiserv2\_2022-06-  
28\_153336\_fkmK8/rnahybrid\_input\_mirna\_sequences.file -m 29851

searching

dataset: 1

mde of 5008c: -65.000008

Individual hits

-----  
dataset: 1  
target: OV054768.1  
length: 29851  
miRNA : 5008c  
length: 30

mfe: -35.7 kcal/mol



p-value: 1.000000e+00

position 1486  
target 5' A GUUCUCUUAUGUUGG AACAAG UAUUGGGUCCACGU U  
3'  
GGCUGUGU UUGCCAU UGUGCC GCUAGCGC  
UCGAUACG AGUGGUG AUAUGG UGGUUGCG  
miRNA 3' G  
5'

-----  
dataset: 1  
target: OV054768.1  
length: 29851  
miRNA : 5008c  
length: 30

mfe: -35.3 kcal/mol  
p-value: 1.000000e+00

position 10397  
target 5' U UGUUACAAUG U GUGU G 3'  
UAGCU GUUCACCA CUG UUACCAAUGU  
GUCGA CGAGUGGU GAU GGUGGUUGCG  
miRNA 3' UA AU 5'

-----  
dataset: 1  
target: OV054768.1  
length: 29851  
miRNA : 5008c  
length: 30

mfe: -35.2 kcal/mol  
p-value: 1.000000e+00

position 17146  
target 5' A GUU A 3'  
CAGCU UGCUC UCAU GCCGCU GAUGC  
GUCGA ACGAG GGUG UGGUGG UUGCG  
miRNA 3' U U AUA 5'

-----  
dataset: 1  
target: OV054768.1  
length: 29851  
miRNA : 5008c  
length: 30

mfe: -33.0 kcal/mol  
p-value: 1.000000e+00

position 14565  
target 5' U A UCUGGUA AUC GAUAA A 3'

|       |    |         |         |   |          |      |    |
|-------|----|---------|---------|---|----------|------|----|
|       |    | GCUAUGC | CGCUGCU |   | UAUUACUA | ACGC |    |
|       |    | CGAUACG | GUGGUGA |   | AUGGUGGU | UGCG |    |
| miRNA | 3' | GU      | A       | U |          |      | 5' |

-----

dataset: 1  
target: OV054768.1  
length: 29851  
miRNA : 5008c  
length: 30

mfe: -32.9 kcal/mol  
p-value: 1.000000e+00

position 13751

|        |    |      |     |        |          |        |   |    |
|--------|----|------|-----|--------|----------|--------|---|----|
| target | 5' | A    | GAC | G      | A        | GU     | C | 3' |
|        |    | CGGU | AUG | UACCAC | UAUAUCAC | CAACGU |   |    |
|        |    | GUCG | UAC | GUGGUG | AUAUGGUG | GUUGCG |   |    |
| miRNA  | 3' | A    | GA  |        |          |        |   | 5' |

-----

dataset: 1  
target: OV054768.1  
length: 29851  
miRNA : 5008c  
length: 30

mfe: -32.7 kcal/mol  
p-value: 1.000000e+00

position 17424

|        |    |     |        |        |      |      |      |    |
|--------|----|-----|--------|--------|------|------|------|----|
| target | 5' | U   | GACCC  | AU     | UG   | CC   | A    | 3' |
|        |    | GGC | UGCUC  | A      | UACC | CA   | ACGC |    |
|        |    | UCG | ACGAGU | AUGG   | GU   | UGCG |      |    |
| miRNA  | 3' | G   | AU     | GGUGAU | UG   |      |      | 5' |

-----

dataset: 1  
target: OV054768.1  
length: 29851  
miRNA : 5008c  
length: 30

mfe: -32.5 kcal/mol  
p-value: 1.000000e+00

position 28401

|        |    |    |            |     |    |    |    |   |    |
|--------|----|----|------------|-----|----|----|----|---|----|
| target | 5' | U  | GUCUUG     | CUC | U  | A  | UG | A | 3' |
|        |    | GC | GUUCACCGCU | AC  | CA | CA | GC |   |    |
|        |    | CG | CGAGUGGUGA | UG  | GU | GU | CG |   |    |
| miRNA  | 3' | GU | AUA        | UA  | G  | UG |    |   | 5' |

-----

dataset: 1  
target: OV054768.1  
length: 29851  
miRNA : 5008c  
length: 30

mfe: -32.4 kcal/mol  
p-value: 1.000000e+00

position 29487  
target 5' G A G CAACUCAGGCCUAA CAUGCAG A G A 3'  
AGC GUGCU ACU ACU ACCAC CAA GC  
UCG UACGA UGG UGA UGGUG GUU CG  
miRNA 3' G A G UA G 5'

dataset: 1  
target: OV054768.1  
length: 29851  
miRNA : 5008c  
length: 30

mfe: -32.3 kcal/mol  
p-value: 1.000000e+00

position 26688  
target 5' U UGUUUU UU AGAAUAAAUUGGAU GG G 3'  
UAGCU GUGCUUGCUGCUGU AC CACC UG  
GUCGA UACGAGUGGUGAUA UG GUGG GC  
miRNA 3' UU G 5'

dataset: 1  
target: OV054768.1  
length: 29851  
miRNA : 5008c  
length: 30

mfe: -32.3 kcal/mol  
p-value: 1.000000e+00

position 24208  
target 5' U GCAG G AA UGCU A 3'  
GGU GUGCU CAUUAC AUACCAUU AUGC  
UCG UACGA GUGGUG UAUGGUGG UGCG  
miRNA 3' G A A U 5'

dataset: 1  
target: OV054768.1  
length: 29851  
miRNA : 5008c  
length: 30

mfe: -32.0 kcal/mol  
p-value: 1.000000e+00

position 4679  
target 5' C CAGUUUC UUCU UG GUUA A 3'  
CAGCUA UGU UCACC AUGCU CAGCGU  
GU CGAU ACG AGUGG UAUGG GUUGCG  
miRNA 3' UGA UG 5'

---

dataset: 1  
target: OV054768.1  
length: 29851  
miRNA : 5008c  
length: 30

mfe: -32.0 kcal/mol  
p-value: 1.000000e+00

position 26782  
target 5' U CUUCAU UUCAG U UG GU G 3'  
CAGCUA UGCUU CU ACUG U CGC ACGC  
GU CGAU ACGAG GG UGAU A GUG UGCG  
miRNA 3' U UG GU 5'

---

dataset: 1  
target: OV054768.1  
length: 29851  
miRNA : 5008c  
length: 30

mfe: -31.8 kcal/mol  
p-value: 1.000000e+00

position 16143  
target 5' U AUG A UC G A 3'  
GUUAUGCUUACUA AUA CACC AA GU  
CGAUACGAGUGGU UAU GUGG UU CG  
miRNA 3' GU GA G G 5'

---

dataset: 1  
target: OV054768.1  
length: 29851  
miRNA : 5008c  
length: 30

mfe: -31.7 kcal/mol  
p-value: 1.000000e+00

position 16918  
target 5' A A CAUUAAGUG UAC G AAGA A 3'  
CAGU AUGC CACC ACUA UGCCAC GC

miRNA 3' GUCG UACG A A GUGG UGAU AUGGUG CG GUUG 5'

dataset: 1  
target: OV054768.1  
length: 29851  
miRNA : 5008c  
length: 30

mfe: -31.7 kcal/mol  
p-value: 1.000000e+00

position 4179  
target 5' A GG AAA A 3'  
GGCUG GU CACUACUG UGCUAGCG  
UCGAU CG GUGGUGAU GUGGUUGC  
miRNA 3' G A A AUG G 5'

dataset: 1  
target: OV054768.1  
length: 29851  
miRNA : 5008c  
length: 30

mfe: -31.6 kcal/mol  
p-value: 1.000000e+00

position 1317  
target 5' A AAG UGUGGUUACU AA U 3'  
AG GUGC CACUACU UACC CCA AUGC  
UC UACG GUGGUGA AUGG GGU UGCG  
miRNA 3' G GA A U U 5'

dataset: 1  
target: OV054768.1  
length: 29851  
miRNA : 5008c  
length: 30

mfe: -31.6 kcal/mol  
p-value: 1.000000e+00

position 29155  
target 5' U C AAA UG AAUU C U 3'  
GGC GC U CAC UGCC CCAGCGC  
UCG CG G GUG AUGG GGUUGCG  
miRNA 3' G AUA A UG AU U 5'

dataset: 1

target: OV054768.1  
length: 29851  
miRNA : 5008c  
length: 30

mfe: -31.5 kcal/mol  
p-value: 1.000000e+00

position 26976  
target 5' C UGACAUCAAGGACC CUAAGAAA GUU C G U 3'  
GCUG UGC UCACU GCUA AUCAC AACGC  
CGAU ACG AGUGG UGAU UGGUG UUGCG  
miRNA 3' GU A G 5'

---

dataset: 1  
target: OV054768.1  
length: 29851  
miRNA : 5008c  
length: 30

mfe: -31.5 kcal/mol  
p-value: 1.000000e+00

position 14780  
target 5' U G UA G CGUUAUAAU A 3'  
CAGC AU U ACUACUACU CUACCAAC  
GUCG UA A UGGUGAUA GGUGGUUG  
miRNA 3' A CG G U CG 5'

---

dataset: 1  
target: OV054768.1  
length: 29851  
miRNA : 5008c  
length: 30

mfe: -31.4 kcal/mol  
p-value: 1.000000e+00

position 16196  
target 5' A ACA AGU UAC G U 3'  
GGCUAUGU CACCGC AUAC CU A GC  
UCGAUACG GUGGUG UAUG GG U CG  
miRNA 3' G A A GU U G 5'

---

dataset: 1  
target: OV054768.1  
length: 29851  
miRNA : 5008c  
length: 30

mfe: -31.4 kcal/mol

p-value: 1.000000e+00

position 29697

```
target 5'      A      AUUU      G C 3'
             GC CACCAC      UCACCGA GC
             CG GUGGUG      GGUGGUU CG
miRNA  3' GUCGAUA A      AUAU      G 5'
```

dataset: 1

target: OV054768.1

length: 29851

miRNA : 5008c

length: 30

mfe: -31.3 kcal/mol

p-value: 1.000000e+00

position 11107

```
target 5'  U      GGUA      U      UU  A 3'
           GCUAUG      UUAUUGCUAUG CUGCU  UGC
           CGAUAC      AGUGGUGAUAU GGUGG  GCG
miRNA  3' GU      G      UU      5'
```

dataset: 1

target: OV054768.1

length: 29851

miRNA : 5008c

length: 30

mfe: -31.2 kcal/mol

p-value: 1.000000e+00

position 13219

```
target 5'  U  G  A  UGU GU      U  C 3'
           GGU GUGC UCG  U  CUGUACUGCCG UGC
           UCG UACG AGU  G  GAUAUGGUGGU GCG
miRNA  3' G  A      GU      U      5'
```

dataset: 1

target: OV054768.1

length: 29851

miRNA : 5008c

length: 30

mfe: -31.1 kcal/mol

p-value: 1.000000e+00

position 1178

```
target 5'  C      G      AAUGA  A      AUG  C 3'
           CAGU  UGC UCACCA      AUGC ACCAA  UGC
           GUCG  ACG AGUGGU      UAUG UGGUU  GCG
```

miRNA 3' AU GA G 5'

dataset: 1  
target: OV054768.1  
length: 29851  
miRNA : 5008c  
length: 30

mfe: -31.1 kcal/mol  
p-value: 1.000000e+00

position 2865  
target 5' A AAA A UG UG G G U 3'  
AGU UG GUUCGCC UGU UG CA AUGC  
UCG AU CGAGUGG AUA GU GU UGCG  
miRNA 3' G A UG UG G 5'

### Delta top 25 tDR-Val

Version: RNAhybrid 2.2  
Command line: /vol/bioapps/bin/RNAhybrid.bin -t  
/var/bibiserv2/anonymous/rnahybrid/28/15/00/bibiserv2\_2022-06-  
28\_150030\_iit5m/rnahybrid\_input\_target\_rna\_sequences\_.file -s 3utr\_human -n  
31 -b 25 -m 29836 -q  
/var/bibiserv2/anonymous/rnahybrid/28/15/00/bibiserv2\_2022-06-  
28\_150030\_iit5m/rnahybrid\_input\_mirna\_sequences.file  
searching  
dataset: 1  
mde of 5027: -64.200005  
Individual hits

dataset: 1  
target: OK091006.1  
length: 29836  
miRNA : 5027  
length: 31

mfe: -31.0 kcal/mol  
p-value: 1.000000e+00

position 6131  
target 5' G GAUUAUAA A 3'  
GUG AUGUGGUGGCUAUU ACACUAC  
CGC UGCACUAUUGGUGA UGUGAUG  
miRNA 3' U CCUUUG 5'

dataset: 1  
target: OK091006.1  
length: 29836  
miRNA : 5027



length: 31

mfe: -30.0 kcal/mol  
p-value: 1.000000e+00

position 6426  
target 5' A U A CGAAG UG A 3'  
GUG AAUGUGA AACUAC U UA GGAGAC  
CGC UUGCACU UUGGUG G AU CCUUUG  
miRNA 3' A AU UG G 5'

---

dataset: 1  
target: OK091006.1  
length: 29836  
miRNA : 5027  
length: 31

mfe: -29.9 kcal/mol  
p-value: 1.000000e+00

position 29226  
target 5' C G U A U C 3'  
G GAACGUGG UGACC UACAC GG GC  
C CUUGCACU AUUGG AUGUG CC UG  
miRNA 3' G UG AUG UU 5'

---

dataset: 1  
target: OK091006.1  
length: 29836  
miRNA : 5027  
length: 31

mfe: -29.6 kcal/mol  
p-value: 1.000000e+00

position 12210  
target 5' U C CA GCA GUAAGU A 3'  
UGA CGUGAUG GCCAU AC UGAAA  
GCU GCACUAU UGGUG UG GCCUUU  
miRNA 3' C U AUG AU G 5'

---

dataset: 1  
target: OK091006.1  
length: 29836  
miRNA : 5027  
length: 31

mfe: -29.3 kcal/mol  
p-value: 1.000000e+00

position 10090

```

target 5'      U      CA      UA      UCUUU      U 3'
              UGUGGUA  ACUACACU  ACGG      GGC
              GCACUAU  UGAUGUGA  UGCC      UUG
miRNA  3' CGCUU      UGG      U      5'

```

---

```

dataset: 1
target: OK091006.1
length: 29836
miRNA : 5027
length: 31

```

```

mfe: -29.2 kcal/mol
p-value: 1.000000e+00

```

```

position 10641
target 5'      U      U      UGUA      UG UAUAA      A 3'
              AGC UGGU      CGCUGC  U      AUGGAGAC
              UUG ACUA      GUGAUG  A      UGCCUUUG
miRNA  3' CGC      C      UUG      UG      5'

```

---

```

dataset: 1
target: OK091006.1
length: 29836
miRNA : 5027
length: 31

```

```

mfe: -29.0 kcal/mol
p-value: 1.000000e+00

```

```

position 1430
target 5' C  A  G      CGC      UU      U 3'
              GU AG GUGGU      ACUAUUGC CU  GGAGGC
              CG UU CACUA      UGGUGAUG GA  CCUUUG
miRNA  3'      C  G      U      U  UG      5'

```

---

```

dataset: 1
target: OK091006.1
length: 29836
miRNA : 5027
length: 31

```

```

mfe: -29.0 kcal/mol
p-value: 1.000000e+00

```

```

position 8753
target 5' A  C      GG AG      AU  CAA  U 3'
              GC AGCGUGGU  U  UUAUACUA  GA  AGC
              CG UUGCACUA  G  GAUGUGAU  CU  UUG
miRNA  3'      C      UU GU      GC      5'

```

---

dataset: 1  
target: OK091006.1  
length: 29836  
miRNA : 5027  
length: 31

mfe: -29.0 kcal/mol  
p-value: 1.000000e+00

position 29069  
target 5' G A GA AACCCAA U 3'  
GC GACGUGGU CCA ACA GGAAAU  
CG UUGCACUA GGU UGU CCUUUG  
miRNA 3' C UU GA GAUG 5'

dataset: 1  
target: OK091006.1  
length: 29836  
miRNA : 5027  
length: 31

mfe: -28.9 kcal/mol  
p-value: 1.000000e+00

position 29677  
target 5' A U AAG C UUC C C 3'  
GGAC UGA AGCCAC ACAUU AC GAGGC  
CUUG ACU UUGGUG UGUGA UG CUUUG  
miRNA 3' CG C A A C 5'

dataset: 1  
target: OK091006.1  
length: 29836  
miRNA : 5027  
length: 31

mfe: -28.7 kcal/mol  
p-value: 1.000000e+00

position 6339  
target 5' A G A C 3'  
G GAAUG GAUAAUC UUGC CUGCG AGAU  
C CUUGC CUAUUGG GAUG GAUGC UUUG  
miRNA 3' G A U U C 5'

dataset: 1  
target: OK091006.1  
length: 29836  
miRNA : 5027  
length: 31

mfe: -28.6 kcal/mol  
p-value: 1.000000e+00

position 4131  
target 5' C UAU U AAAAAGUCUGGUG U G 3'  
UGUGGU ACC ACU GCACUAC GAAAU  
GCACUA UGG UGA UGUGAUG CUUUG  
miRNA 3' CGCUU U C 5'

---

dataset: 1  
target: OK091006.1  
length: 29836  
miRNA : 5027  
length: 31

mfe: -28.4 kcal/mol  
p-value: 1.000000e+00

position 27046  
target 5' C UAGCAG CAGGUUUU AUACAGUC A UU A 3'  
GC AGCGUG GUGACU GCUGC GCUAC GGA GGC  
CG UUGCAC UAUUGG UGAUG UGAUG CCU UUG  
miRNA 3' C 5'

---

dataset: 1  
target: OK091006.1  
length: 29836  
miRNA : 5027  
length: 31

mfe: -28.0 kcal/mol  
p-value: 1.000000e+00

position 2219  
target 5' G AAAU UC UG AA U 3'  
GUGGAC UG ACC UGCA GGAAAU  
CGCUUG AC UGG AUGU CCUUUG  
miRNA 3' C UAU UG GAUG 5'

---

dataset: 1  
target: OK091006.1  
length: 29836  
miRNA : 5027  
length: 31

mfe: -27.8 kcal/mol  
p-value: 1.000000e+00

position 8673  
target 5' U UG CGUGACAUU U A U U 3'

```
          UGA  GUGGUG UCACU          GCA CUAC GA AC
          GCU  CACUAU GGUGA          UGU GAUG CU UG
miRNA  3' C   UG      U              C   U      5'
```

---

dataset: 1  
target: OK091006.1  
length: 29836  
miRNA : 5027  
length: 31

mfe: -27.7 kcal/mol  
p-value: 1.000000e+00

position 626  
target 5' G A C 3'  
 GAGC UGGUGGCCAU GUUACGG  
 CUUG ACUAUUGGUG UGAUGCC  
miRNA 3' CG C AUG UUUG 5'

---

dataset: 1  
target: OK091006.1  
length: 29836  
miRNA : 5027  
length: 31

mfe: -27.7 kcal/mol  
p-value: 1.000000e+00

position 28565  
target 5' A UG UU C 3'  
 GA GU AU CUACUAC CUA GGAA  
 CU CA UA GGUGAUG GAU CCUU  
miRNA 3' CG UG C UU U G UG 5'

---

dataset: 1  
target: OK091006.1  
length: 29836  
miRNA : 5027  
length: 31

mfe: -27.7 kcal/mol  
p-value: 1.000000e+00

position 17130  
target 5' A UU UCUCAU GUUGAU U A 3'  
 GC GC GCCGCU GCACUAUG GAGA  
 CG UG UGGUGA UGUGAUGC CUUU  
miRNA 3' CU CACUAU G 5'

---

dataset: 1  
target: OK091006.1  
length: 29836  
miRNA : 5027  
length: 31

mfe: -27.7 kcal/mol  
p-value: 1.000000e+00

position 19816  
target 5' U GG ACAUU A UGAUC CU A 3'  
UG UGUGG GCUGCU AUACUG UGGGA AC  
GC GCACU UGGUGA UGUGAU GCCUU UG  
miRNA 3' C UU AU 5'

dataset: 1  
target: OK091006.1  
length: 29836  
miRNA : 5027  
length: 31

mfe: -27.7 kcal/mol  
p-value: 1.000000e+00

position 749  
target 5' C ACUCAU GCU GGAGGGGCAUA UC A 3'  
GUGA GCGUGA UAAC CACU CGCUAUG GAU  
CGCU UGCACU AUUG GUGA GUGAUGC UUG  
miRNA 3' U CU 5'

dataset: 1  
target: OK091006.1  
length: 29836  
miRNA : 5027  
length: 31

mfe: -27.6 kcal/mol  
p-value: 1.000000e+00

position 25904  
target 5' C A CU GAUUGGUGG GAAAA C 3'  
UGAAC UGA ACCA UUAUACU AUGGGAAU  
GCUUG ACU UGGU GAUGUGA UGCCUUUG  
miRNA 3' C C AU 5'

dataset: 1  
target: OK091006.1  
length: 29836  
miRNA : 5027  
length: 31

mfe: -27.4 kcal/mol  
p-value: 1.000000e+00

position 3492  
target 5' U C AUA UAAU C 3'  
UGAAU UGAUGAUUAC GCUAC GGA  
GCUUG ACUAUUGGUG UGAUG CCU  
miRNA 3' C C AUG UUG 5'

---

dataset: 1  
target: OK091006.1  
length: 29836  
miRNA : 5027  
length: 31

mfe: -27.4 kcal/mol  
p-value: 1.000000e+00

position 4563  
target 5' A ACUCU UACAAU UG U A 3'  
UGAA UGU GCCACU GCUAUG AAC  
GCUU GCA UGGUGA UGAUGC UUG  
miRNA 3' C CUAU UG CU 5'

---

dataset: 1  
target: OK091006.1  
length: 29836  
miRNA : 5027  
length: 31

mfe: -27.3 kcal/mol  
p-value: 1.000000e+00

position 308  
target 5' C CUCG GUG UU U 3'  
GCG ACGUG UAC GCU GGAGAC  
CGC UGCAC GUG UGA CCUUUG  
miRNA 3' U UAUUG AUG UG 5'

---

dataset: 1  
target: OK091006.1  
length: 29836  
miRNA : 5027  
length: 31

mfe: -27.3 kcal/mol  
p-value: 1.000000e+00

position 1911  
target 5' C U UUUUACAGAA AACAAU AG U 3'  
UG GCGUG GGCCGCUAU ACU AUGGAA

GC UGCAC UUGGUGAUG UGA UGCCUU  
miRNA 3' C U UA UG 5'

## Delta Top 25 tDR-Gly

ersion: RNAhybrid 2.2

Command line:/vol/bioapps/bin/RNAhybrid.bin -s 3utr\_human -m 29836 -t  
/var/bibiserv2/anonymous/rnahybrid/28/15/39/bibiserv2\_2022-06-  
28\_153936\_UU6f6/rnahybrid\_input\_target\_rna\_sequences\_.file -n 30 -q  
/var/bibiserv2/anonymous/rnahybrid/28/15/39/bibiserv2\_2022-06-  
28\_153936\_UU6f6/rnahybrid\_input\_mirna\_sequences.file -b 25

searching

dataset: 1

mde of 5008c: -65.000008

Individual hits

dataset: 1

target: OK091006.1

length: 29836

miRNA : 5008c

length: 30

mfe: -35.7 kcal/mol

p-value: 1.000000e+00

position 1459

target 5' A GUUCUCUUAUGUUGG AACAAG UAUUGGGUCCACGU U  
3'

GGCUGUGU UUGCCAU UGUGCC GCUAGCGC  
UCGAUACG AGUGGUG AUAUGG UGGUUGCG

miRNA 3' G

5'

dataset: 1

target: OK091006.1

length: 29836

miRNA : 5008c

length: 30

mfe: -35.3 kcal/mol

p-value: 1.000000e+00

position 10370

target 5' U UGUUACAAUG U GUGU G 3'

UAGCU GUUCACCA CUG UUACCAAUGU  
GUCGA CGAGUGGU GAU GGUGGUUGCG

miRNA 3' UA

AU

5'

dataset: 1

target: OK091006.1



length: 29836  
miRNA : 5008c  
length: 30

mfe: -35.2 kcal/mol  
p-value: 1.000000e+00

position 17128  
target 5' A GUU A 3'  
CAGCU UGCUC UCAU GCCGCU GAUGC  
GUCCA ACGAG GGUG UGGUGG UUGCG  
miRNA 3' U U AUA 5'

---

dataset: 1  
target: OK091006.1  
length: 29836  
miRNA : 5008c  
length: 30

mfe: -33.0 kcal/mol  
p-value: 1.000000e+00

position 14547  
target 5' U A UCUGGUAUAUC GAUAA A 3'  
GCUAUGC CGCUGCU UAUUACUA ACGC  
CGAUACG GUGGUGA AUGGUGGU UGCG  
miRNA 3' GU A U 5'

---

dataset: 1  
target: OK091006.1  
length: 29836  
miRNA : 5008c  
length: 30

mfe: -32.9 kcal/mol  
p-value: 1.000000e+00

position 13733  
target 5' A GAC G A GU C 3'  
CGGU AUG UACCAC UAUUACAC CAACGU  
GUCC UAC GUGGUG AUAUGGUG GUUGCG  
miRNA 3' A GA 5'

---

dataset: 1  
target: OK091006.1  
length: 29836  
miRNA : 5008c  
length: 30

mfe: -32.7 kcal/mol  
p-value: 1.000000e+00

position 17406  
target 5' U GACCC AU UG CC A 3'  
GGC UGCUCA UACC CA ACGC  
UCG ACGAGU AUGG GU UGCG  
miRNA 3' G AU GGUGAU UG 5'

---

dataset: 1  
target: OK091006.1  
length: 29836  
miRNA : 5008c  
length: 30

mfe: -32.5 kcal/mol  
p-value: 1.000000e+00

position 28393  
target 5' U GUCUUG CUC U A UG A 3'  
GC GUUCACCGCU AC CA CA GC  
CG CGAGUGGUGA UG GU GU CG  
miRNA 3' GU AUA UA G UG 5'

---

dataset: 1  
target: OK091006.1  
length: 29836  
miRNA : 5008c  
length: 30

mfe: -32.4 kcal/mol  
p-value: 1.000000e+00

position 29479  
target 5' G A G CAACUCAGGCCUAA CAUGCAG A G A 3'  
AGC GUGCU ACU ACU ACCAC CAA GC  
UCG UACGA UGG UGA UGGUG GUU CG  
miRNA 3' G A G UA G 5'

---

dataset: 1  
target: OK091006.1  
length: 29836  
miRNA : 5008c  
length: 30

mfe: -32.3 kcal/mol  
p-value: 1.000000e+00

position 26679  
target 5' U UGUUUU UU AGAAUAAAUUGGAU GG G 3'  
UAGCU GUGCUUGCUGCUGU AC CACC UG  
GUCCA UACGAGUGGUGAUA UG GUGG GC  
miRNA 3' UU G 5'

-----  
dataset: 1  
target: OK091006.1  
length: 29836  
miRNA : 5008c  
length: 30

mfe: -32.3 kcal/mol  
p-value: 1.000000e+00

position 24199  
target 5' U GCAG G AA UGCU A 3'  
GGU GUGCU CAUAC AUACCAU AUGC  
UCG UACGA GUGGUG UAUGGUG UGCG  
miRNA 3' G A A U 5'

-----  
dataset: 1  
target: OK091006.1  
length: 29836  
miRNA : 5008c  
length: 30

mfe: -32.0 kcal/mol  
p-value: 1.000000e+00

position 4652  
target 5' C CAGUUUC UUCU UG GUUA A 3'  
CAGCUA UGU UCACC AUGCU CAGCGU  
GUUGAU ACG AGUGG UAUGG GUUGCG  
miRNA 3' UGA UG 5'

-----  
dataset: 1  
target: OK091006.1  
length: 29836  
miRNA : 5008c  
length: 30

mfe: -32.0 kcal/mol  
p-value: 1.000000e+00

position 26773  
target 5' U CUUCAU UUCAG U UG GU G 3'  
CAGCUA UGCUU CU ACUG U CGC ACGC  
GUUGAU ACGAG GG UGAU A GUG UGCG  
miRNA 3' U UG GU 5'

-----  
dataset: 1  
target: OK091006.1  
length: 29836

miRNA : 5008c  
length: 30

mfe: -31.7 kcal/mol  
p-value: 1.000000e+00

position 16900  
target 5' A A CAUUAAGUG UAC G AAGA A 3'  
CAGU AUGC CACC ACUA UGCCAC GC  
GUCG UACG GUGG UGAU AUGGUG CG  
miRNA 3' A A GUUG 5'

---

dataset: 1  
target: OK091006.1  
length: 29836  
miRNA : 5008c  
length: 30

mfe: -31.6 kcal/mol  
p-value: 1.000000e+00

position 1290  
target 5' A AAG UGUGGUUACU AA U 3'  
AG GUGC CACUACU UACC CCA AUGC  
UC UACG GUGGUGA AUGG GGU UGCG  
miRNA 3' G GA A U U 5'

---

dataset: 1  
target: OK091006.1  
length: 29836  
miRNA : 5008c  
length: 30

mfe: -31.6 kcal/mol  
p-value: 1.000000e+00

position 29147  
target 5' U C AAA UG AAUU C U 3'  
GGC GC U CAC UGCC CCAGCGC  
UCG CG G GUG AUGG GGUUGCG  
miRNA 3' G AUA A UG AU U 5'

---

dataset: 1  
target: OK091006.1  
length: 29836  
miRNA : 5008c  
length: 30

mfe: -31.5 kcal/mol  
p-value: 1.000000e+00

position 26967  
target 5' C UGACAUCAAGGACC CUAAGAAA GUU C G U 3'  
GCUG UGC UCACU GCUA AUCAC AACGC  
CGAU ACG AGUGG UGAU UGGUG UUGCG  
miRNA 3' GU A G 5'

---

dataset: 1  
target: OK091006.1  
length: 29836  
miRNA : 5008c  
length: 30

mfe: -31.5 kcal/mol  
p-value: 1.000000e+00

position 14762  
target 5' U G UA G CGUUAUAU A 3'  
CAGC AU U ACUACUACU CUACCAAC  
GUCG UA A UGGUGUAU GGUGGUUG  
miRNA 3' A CG G U CG 5'

---

dataset: 1  
target: OK091006.1  
length: 29836  
miRNA : 5008c  
length: 30

mfe: -31.4 kcal/mol  
p-value: 1.000000e+00

position 16178  
target 5' A ACA AGU UAC G U 3'  
GGCUAUGU CACCGC AUAC CU A GC  
UUGAUACG GUGGUG UAUG GG U CG  
miRNA 3' G A A GU U G 5'

---

dataset: 1  
target: OK091006.1  
length: 29836  
miRNA : 5008c  
length: 30

mfe: -31.4 kcal/mol  
p-value: 1.000000e+00

position 29689  
target 5' A AUUU G C 3'  
GC CACCAC UCACCGA GC  
CG GUGGUG GGUGGUU CG  
miRNA 3' GUUGUAU A AUAU G 5'

-----  
dataset: 1  
target: OK091006.1  
length: 29836  
miRNA : 5008c  
length: 30

mfe: -31.3 kcal/mol  
p-value: 1.000000e+00

position 11080  
target 5' U GGUA U UU A 3'  
GCUAUG UUAUUGCUAUG CUGCU UGC  
CGAUAC AGUGGUGAUAU GGUGG GCG  
miRNA 3' GU G UU 5'

-----  
dataset: 1  
target: OK091006.1  
length: 29836  
miRNA : 5008c  
length: 30

mfe: -31.2 kcal/mol  
p-value: 1.000000e+00

position 13201  
target 5' U G A UGU GU U C 3'  
GGU GUGC UCG U CUGUACUGCCG UGC  
UCG UACG AGU G GAUAUGGUGGU GCG  
miRNA 3' G A GU U 5'

-----  
dataset: 1  
target: OK091006.1  
length: 29836  
miRNA : 5008c  
length: 30

mfe: -31.1 kcal/mol  
p-value: 1.000000e+00

position 1151  
target 5' C G AAUGA A AUG C 3'  
CAGU UGC UCACCA AUGC ACCAA UGC  
GUCG ACG AGUGGU UAUG UGGUU GCG  
miRNA 3' AU GA G 5'

-----  
dataset: 1  
target: OK091006.1  
length: 29836  
miRNA : 5008c

length: 30

mfe: -31.1 kcal/mol

p-value: 1.000000e+00

position 2838

```
target 5' A   AAA   A           UG   UG   G   G       U 3'
          AGU   UG GUUCGCC   UGU   UG CA AUGC
          UCG   AU CGAGUGG   AUA   GU GU UGCG
miRNA  3' G           A           UG   UG   G           5'
```

dataset: 1

target: OK091006.1

length: 29836

miRNA : 5008c

length: 30

mfe: -30.9 kcal/mol

p-value: 1.000000e+00

position 18206

```
target 5' A   A   G           ACAUGUU           C   A 3'
          AGUU AUG UUACC CUA           UAUCACC GCG
          UCGA UAC AGUGG GAU           AUGGUGG UGC
miRNA  3' G           G           U           U   G 5'
```

dataset: 1

target: OK091006.1

length: 29836

miRNA : 5008c

length: 30

mfe: -30.9 kcal/mol

p-value: 1.000000e+00

position 25226

```
target 5' A   A           UG UG   G   G       U 3'
          CA UUAUGCUU   C   UAU ACCA U   UGC
          GU GAUACGAG   G   AUA UGGU G   GCG
miRNA  3'   C           UG UG           G UU       5'
```

## BA.1 top 25 with tDR-Val

Version: RNAhybrid 2.2

Command line: /vol/bioapps/bin/RNAhybrid.bin -n 31 -m 29684 -b 25 -s  
3utr\_human -q /var/bibiserv2/anonymous/rnahybrid/28/15/23/bibiserv2\_2022-06-  
28\_152328\_Bgqvyrnahybrid\_input\_mirna\_sequences.file -t  
/var/bibiserv2/anonymous/rnahybrid/28/15/23/bibiserv2\_2022-06-  
28\_152328\_Bgqvyrnahybrid\_input\_target\_rna\_sequences\_.file

searching  
dataset: 1  
mde of 5027: -64.200005  
Individual hits

---

dataset: 1  
target: OL672836.1  
length: 29684  
miRNA : 5027  
length: 31

mfe: -31.0 kcal/mol  
p-value: 1.000000e+00

position 6104  
target 5' G GAUUAUAA A 3'  
GUG AUGUGGUGGCUAUU ACACUAC  
CGC UGCACUAUUGGUGA UGUGAUG  
miRNA 3' U CCUUUG 5'

---

dataset: 1  
target: OL672836.1  
length: 29684  
miRNA : 5027  
length: 31

mfe: -30.9 kcal/mol  
p-value: 1.000000e+00

position 29620  
target 5' A U AAG C UUCACCGAGGCCAC U G 3'  
GGAC UGA AGCCAC ACAUU GCGGAG AC  
CUUG ACU UUGGUG UGUGA UGCCUU UG  
miRNA 3' CG C A A 5'

---

dataset: 1  
target: OL672836.1  
length: 29684  
miRNA : 5027  
length: 31

mfe: -30.5 kcal/mol  
p-value: 1.000000e+00

position 5453  
target 5' U UGUAAA UG G A A C A 3'  
UGAACGUGGUG ACU UG AC AC G AGAC  
GCUUGCACUAU UGG AU UG UG C UUUG  
miRNA 3' C UG G A C 5'

---



dataset: 1  
target: OL672836.1  
length: 29684  
miRNA : 5027  
length: 31

mfe: -30.0 kcal/mol  
p-value: 1.000000e+00

position 6399  
target 5' A U A CGAAG UG A 3'  
GUG AAUGUGA AACUAC U UA GGAGAC  
CGC UUGCACU UUGGUG G AU CCUUUG  
miRNA 3' A AU UG G 5'

---

dataset: 1  
target: OL672836.1  
length: 29684  
miRNA : 5027  
length: 31

mfe: -29.9 kcal/mol  
p-value: 1.000000e+00

position 29169  
target 5' C G U A U C 3'  
G GAACGUGG UGACC UACAC GG GC  
C CUUGCACU AUUGG AUGUG CC UG  
miRNA 3' G UG AUG UU 5'

---

dataset: 1  
target: OL672836.1  
length: 29684  
miRNA : 5027  
length: 31

mfe: -29.6 kcal/mol  
p-value: 1.000000e+00

position 12171  
target 5' U C CA GCA GUAAGU A 3'  
UGA CGUGAUG GCCAU AC UGGAAA  
GCU GCACUAU UGGUG UG GCCUUU  
miRNA 3' C U AUG AU G 5'

---

dataset: 1  
target: OL672836.1  
length: 29684  
miRNA : 5027  
length: 31

mfe: -29.3 kcal/mol  
p-value: 1.000000e+00

position 10060  
target 5' U CA UA UCUUU U 3'  
UGUGGUA ACUACACU ACGG GGC  
GCACUAU UGAUGUGA UGCC UUG  
miRNA 3' CGCUU UGG U 5'

---

dataset: 1  
target: OL672836.1  
length: 29684  
miRNA : 5027  
length: 31

mfe: -29.2 kcal/mol  
p-value: 1.000000e+00

position 10611  
target 5' U U UGUA UG UAUAA A 3'  
AGC UGGU CGCUGC U AUGGAGAC  
UUG ACUA GUGAUG A UGCCUUUG  
miRNA 3' CGC C UUG UG 5'

---

dataset: 1  
target: OL672836.1  
length: 29684  
miRNA : 5027  
length: 31

mfe: -29.0 kcal/mol  
p-value: 1.000000e+00

position 1403  
target 5' C A G CGC UU U 3'  
GU AG GUGGU ACUAUUGC CU GGAGGC  
CG UU CACUA UGGUGAUG GA CCUUUG  
miRNA 3' C G U U UG 5'

---

dataset: 1  
target: OL672836.1  
length: 29684  
miRNA : 5027  
length: 31

mfe: -29.0 kcal/mol  
p-value: 1.000000e+00

position 8723  
target 5' A C GG AG AU CAA U 3'  
GC AGCGUGGU U UUAUACUA GA AGC

miRNA 3' CG UUGCACUA G GAUGUGAU CU UUG 5'  
C UU GU GC

dataset: 1  
target: OL672836.1  
length: 29684  
miRNA : 5027  
length: 31

mfe: -29.0 kcal/mol  
p-value: 1.000000e+00

position 29012  
target 5' G A GA AACCCAA U 3'  
GC GACGUGGU CCA ACA GGAAAU  
CG UUGCACUA GGU UGU CCUUUG  
miRNA 3' C UU GA GAUG 5'

dataset: 1  
target: OL672836.1  
length: 29684  
miRNA : 5027  
length: 31

mfe: -28.7 kcal/mol  
p-value: 1.000000e+00

position 6312  
target 5' A G A C 3'  
G GAAUG GAUAAUC UUGC CUGCG AGAU  
C CUUGC CUAUUGG GAUG GAUGC UUUG  
miRNA 3' G A U U C 5'

dataset: 1  
target: OL672836.1  
length: 29684  
miRNA : 5027  
length: 31

mfe: -28.6 kcal/mol  
p-value: 1.000000e+00

position 4104  
target 5' C UAU U AAAAAGGCUGGUG U G 3'  
UGUGGU ACC ACU GCACUAC GAAAU  
GCACUA UGG UGA UGUGAUG CUUUG  
miRNA 3' CGCUU U C 5'

dataset: 1

target: OL672836.1  
length: 29684  
miRNA : 5027  
length: 31

mfe: -28.4 kcal/mol  
p-value: 1.000000e+00

position 26998  
target 5' C UAGCAG CAGGUUUU AUACAGUC A UU A 3'  
GC AGCGUG GUGACU GCUGC GCUAC GGA GGC  
CG UUGCAC UAUUGG UGAUG UGAUG CCU UUG  
miRNA 3' C 5'

dataset: 1  
target: OL672836.1  
length: 29684  
miRNA : 5027  
length: 31

mfe: -28.0 kcal/mol  
p-value: 1.000000e+00

position 2192  
target 5' G AAAU UC UG AA U 3'  
GUGGAC UG ACC UGCA GGAAAU  
CGCUUG AC UGG AUGU CCUUUG  
miRNA 3' C UAU UG GAUG 5'

dataset: 1  
target: OL672836.1  
length: 29684  
miRNA : 5027  
length: 31

mfe: -27.8 kcal/mol  
p-value: 1.000000e+00

position 8643  
target 5' U UG CGUGACAUU U A U U 3'  
UGA GUGGUG UCACU GCA CUAC GA AC  
GCU CACUAU GGUGA UGU GAUG CU UG  
miRNA 3' C UG U C U 5'

dataset: 1  
target: OL672836.1  
length: 29684  
miRNA : 5027  
length: 31

mfe: -27.7 kcal/mol

p-value: 1.000000e+00

position 599

```
target 5' G          A          C          3'
          GAGC UGGUGGCCAU GUUACGG
          CUUG ACUAUUGGUG UGAUGCC
miRNA 3' CG      C          AUG          UUUG 5'
```

---

dataset: 1

target: OL672836.1

length: 29684

miRNA : 5027

length: 31

mfe: -27.7 kcal/mol

p-value: 1.000000e+00

position 28508

```
target 5' A  UG      UU          C  3'
          GA  GU AU  CUACUAC CUA GGAA
          CU  CA UA  GGUGAUG GAU CCUU
miRNA 3' CG  UG  C  UU          U  G      UG 5'
```

---

dataset: 1

target: OL672836.1

length: 29684

miRNA : 5027

length: 31

mfe: -27.7 kcal/mol

p-value: 1.000000e+00

position 17091

```
target 5' A  UU  UCUCAU      GUUGAU      U      A  3'
          GC  GC      GCCGCU      GCACUAUG GAGA
          CG  UG      UGGUGA      UGUGAUGC CUUU
miRNA 3'      CU  CACUAU          G  5'
```

---

dataset: 1

target: OL672836.1

length: 29684

miRNA : 5027

length: 31

mfe: -27.7 kcal/mol

p-value: 1.000000e+00

position 19777

```
target 5' U  GG      ACAUU      A      UGAUC      CU  A  3'
          UG  UGUGG      GCUGCU AUACUG      UGGGA  AC
          GC  GCACU      UGGUGA UGUGAU      GCCUU  UG
```

miRNA 3' C UU AU 5'

dataset: 1  
target: OL672836.1  
length: 29684  
miRNA : 5027  
length: 31

mfe: -27.7 kcal/mol  
p-value: 1.000000e+00

position 722  
target 5' C ACUCAU GCU GGAGGGGCAUA UC A 3'  
GUGA GCGUGA UAAC CACU CGCUAUG GAU  
CGCU UGCACU AUUG GUGA GUGAUGC UUG  
miRNA 3' U CU 5'

dataset: 1  
target: OL672836.1  
length: 29684  
miRNA : 5027  
length: 31

mfe: -27.6 kcal/mol  
p-value: 1.000000e+00

position 25856  
target 5' C A CU GAUUGGUGG GAAAA C 3'  
UGAAC UGA ACCA UUAUACU AUGGGAAU  
GCUUG ACU UGGU GAUGUGA UGCCUUUG  
miRNA 3' C C AU 5'

dataset: 1  
target: OL672836.1  
length: 29684  
miRNA : 5027  
length: 31

mfe: -27.4 kcal/mol  
p-value: 1.000000e+00

position 3465  
target 5' U C AUA UAAU C 3'  
UGAAU UGAUGAUUAC GCUAC GGA  
GCUUG ACUAUUGGUG UGAUG CCU  
miRNA 3' C C AUG UUG 5'

dataset: 1  
target: OL672836.1

length: 29684  
miRNA : 5027  
length: 31

mfe: -27.4 kcal/mol  
p-value: 1.000000e+00

position 4536  
target 5' A ACUCU UACAAU UG U A 3'  
UGAA UGU GCCACU GCUAUG AAC  
GCUU GCA UGGUGA UGAUGC UUG  
miRNA 3' C CUAU UG CU 5'

dataset: 1  
target: OL672836.1  
length: 29684  
miRNA : 5027  
length: 31

mfe: -27.3 kcal/mol  
p-value: 1.000000e+00

position 281  
target 5' C CUCG GUG UU U 3'  
GCG ACGUG UAC GCU GGAGAC  
CGC UGCAC GUG UGA CCUUUG  
miRNA 3' U UAUUG AUG UG 5'

### BA.1 top 25 with tDR-Gly

Version: RNAhybrid 2.2

Command line: /vol/bioapps/bin/RNAhybrid.bin -n 30 -b 25 -m 29684 -q  
/var/bibiserv2/anonymous/rnahybrid/28/15/27/bibiserv2\_2022-06-  
28\_152716\_cgBUf/rnahybrid\_input\_mirna\_sequences.file -s 3utr\_human -t  
/var/bibiserv2/anonymous/rnahybrid/28/15/27/bibiserv2\_2022-06-  
28\_152716\_cgBUf/rnahybrid\_input\_target\_rna\_sequences\_.file  
searching

dataset: 1  
mde of 5008c: -65.000008  
Individual hits

dataset: 1  
target: OL672836.1  
length: 29684  
miRNA : 5008c  
length: 30

mfe: -35.7 kcal/mol  
p-value: 1.000000e+00

position 1432

|             |                 |         |                |          |
|-------------|-----------------|---------|----------------|----------|
| target 5' A | GUUCUCUUAUGUUGG | AACAAG  | UAUUGGGUCCACGU | U        |
| 3'          |                 |         |                |          |
|             | GGCUGUGU        | UUGCCAU | UGUGCC         | GCUAGCGC |
|             | UCGAUACG        | AGUGGUG | AUAUGG         | UGGUUGCG |
| miRNA 3' G  |                 |         |                |          |
| 5'          |                 |         |                |          |

-----

dataset: 1  
target: OL672836.1  
length: 29684  
miRNA : 5008c  
length: 30

mfe: -35.3 kcal/mol  
p-value: 1.000000e+00

position 10340

|             |            |          |      |            |
|-------------|------------|----------|------|------------|
| target 5' U | UGUUACAAUG | U        | GUGU | G 3'       |
|             | UAGCU      | GUUCACCA | CUG  | UUACCAAUGU |
|             | GUCGA      | CGAGUGGU | GAU  | GGUGGUUGCG |
| miRNA 3'    | UA         |          | AU   | 5'         |

-----

dataset: 1  
target: OL672836.1  
length: 29684  
miRNA : 5008c  
length: 30

mfe: -35.2 kcal/mol  
p-value: 1.000000e+00

position 17089

|             |        |       |      |
|-------------|--------|-------|------|
| target 5' A |        | GUU   | A 3' |
|             | CAGCU  | UGCUC | UCAU |
|             | GCCGCU | GAUGC |      |
|             | GUCGA  | ACGAG | GGUG |
|             | UGGUGG | UUGCG |      |
| miRNA 3'    | U      | U     | AUA  |
|             |        |       | 5'   |

-----

dataset: 1  
target: OL672836.1  
length: 29684  
miRNA : 5008c  
length: 30

mfe: -33.0 kcal/mol  
p-value: 1.000000e+00

position 14508

|             |         |            |          |      |
|-------------|---------|------------|----------|------|
| target 5' U | A       | UCUGGUAUUC | GAUAA    | A 3' |
|             | GCUAUGC | CGCUGCU    | UAUUACUA | ACGC |
|             | CGAUACG | GUGGUGA    | AUGGUGGU | UGCG |
| miRNA 3' GU | A       | U          |          | 5'   |



-----  
dataset: 1  
target: OL672836.1  
length: 29684  
miRNA : 5008c  
length: 30

mfe: -32.9 kcal/mol  
p-value: 1.000000e+00

position 13694  
target 5' A GAC G A GU C 3'  
CGGU AUG UACCAC UAUUACAC CAACGU  
GUCG UAC GUGGUG AUAUGGUG GUUGCG  
miRNA 3' A GA 5'

-----  
dataset: 1  
target: OL672836.1  
length: 29684  
miRNA : 5008c  
length: 30

mfe: -32.7 kcal/mol  
p-value: 1.000000e+00

position 17367  
target 5' U GACCC AU UG CC A 3'  
GGC UGCUCA UACC CA ACGC  
UCG ACGAGU AUGG GU UGCG  
miRNA 3' G AU GGUGAU UG 5'

-----  
dataset: 1  
target: OL672836.1  
length: 29684  
miRNA : 5008c  
length: 30

mfe: -32.5 kcal/mol  
p-value: 1.000000e+00

position 28336  
target 5' U GUCUUG CUC U A UG A 3'  
GC GUUCACCGCU AC CA CA GC  
CG CGAGUGGUGA UG GU GU CG  
miRNA 3' GU AUA UA G UG 5'

-----  
dataset: 1  
target: OL672836.1  
length: 29684

miRNA : 5008c  
length: 30

mfe: -32.4 kcal/mol  
p-value: 1.000000e+00

position 29422  
target 5' G A G CAACUCAGGCCUAA CAUGCAG A G A 3'  
AGC GUGCU ACU ACU ACCAC CAA GC  
UCG UACGA UGG UGA UGGUG GUU CG  
miRNA 3' G A G UA G 5'

---

dataset: 1  
target: OL672836.1  
length: 29684  
miRNA : 5008c  
length: 30

mfe: -32.3 kcal/mol  
p-value: 1.000000e+00

position 24151  
target 5' U GCAG G AA UGCU A 3'  
GGU GUGCU CAUAC AUACCAUU AUGC  
UCG UACGA GUGGUG UAUGGUGG UGCG  
miRNA 3' G A A U 5'

---

dataset: 1  
target: OL672836.1  
length: 29684  
miRNA : 5008c  
length: 30

mfe: -32.0 kcal/mol  
p-value: 1.000000e+00

position 4625  
target 5' C CAGUUUC UUCU UG GUUA A 3'  
CAGCUA UGU UCACC AUGCU CAGCGU  
GUCGAU ACG AGUGG UAUGG GUUGCG  
miRNA 3' UGA UG 5'

---

dataset: 1  
target: OL672836.1  
length: 29684  
miRNA : 5008c  
length: 30

mfe: -32.0 kcal/mol  
p-value: 1.000000e+00

position 26725  
target 5' U CUUCAU UUCAG U UG GU G 3'  
CAGCUA UGCUU CU ACUG U CGC ACGC  
GU CGAU ACGAG GG UGAU A GUG UGCG  
miRNA 3' U UG GU 5'

---

dataset: 1  
target: OL672836.1  
length: 29684  
miRNA : 5008c  
length: 30

mfe: -31.7 kcal/mol  
p-value: 1.000000e+00

position 16861  
target 5' A A CAUUAAGUG UAC G AAGA A 3'  
CAGU AUGC CACC ACUA UGCCAC GC  
GUCG UACG GUGG UGAU AUGGUG CG  
miRNA 3' A A GUUG 5'

---

dataset: 1  
target: OL672836.1  
length: 29684  
miRNA : 5008c  
length: 30

mfe: -31.7 kcal/mol  
p-value: 1.000000e+00

position 4125  
target 5' A GG AAA A 3'  
GGCUG GU CACUACUG UGCUAGCG  
UCGAU CG GUGGUGAU GUGGUUGC  
miRNA 3' G A A AUG G 5'

---

dataset: 1  
target: OL672836.1  
length: 29684  
miRNA : 5008c  
length: 30

mfe: -31.6 kcal/mol  
p-value: 1.000000e+00

position 1263  
target 5' A AAG UGUGGUUACU AA U 3'  
AG GUGC CACUACU UACC CCA AUGC  
UC UACG GUGGUGA AUGG GGU UGCG  
miRNA 3' G GA A U U 5'

-----  
dataset: 1  
target: OL672836.1  
length: 29684  
miRNA : 5008c  
length: 30

mfe: -31.6 kcal/mol  
p-value: 1.000000e+00

position 29090  
target 5' U C AAA UG AAUU C U 3'  
GGC GC U CAC UGCC CCAGCGC  
UCG CG G GUG AUGG GGUUGCG  
miRNA 3' G AUA A UG AU U 5'

-----  
dataset: 1  
target: OL672836.1  
length: 29684  
miRNA : 5008c  
length: 30

mfe: -31.5 kcal/mol  
p-value: 1.000000e+00

position 26919  
target 5' C UGACAUCAAGGACC CUAAGAAA GUU C G U 3'  
GCUG UGC UCACU GCUA AUCAC AACGC  
CGAU ACG AGUGG UGAU UGGUG UUGCG  
miRNA 3' GU A G 5'

-----  
dataset: 1  
target: OL672836.1  
length: 29684  
miRNA : 5008c  
length: 30

mfe: -31.5 kcal/mol  
p-value: 1.000000e+00

position 14723  
target 5' U G UA G CGUUAUAAU A 3'  
CAGC AU U ACUACUAU CUACCAAC  
GUCG UA A UGGUGAUA GGUGGUUG  
miRNA 3' A CG G U CG 5'

-----  
dataset: 1  
target: OL672836.1  
length: 29684  
miRNA : 5008c

length: 30

mfe: -31.4 kcal/mol  
p-value: 1.000000e+00

position 16139

```
target 5' A          ACA          AGU  UAC  G  U 3'
          GGCUAUGU  CACCGC AUAC  CU  A GC
          UCGAUACG  GUGGUG UAUG  GG  U CG
miRNA  3' G          A          A  GU  U  G  5'
```

dataset: 1

target: OL672836.1

length: 29684

miRNA : 5008c

length: 30

mfe: -31.4 kcal/mol  
p-value: 1.000000e+00

position 29632

```
target 5'          A          AUUU          G  C 3'
          GC CACCAC  UCACCGA GC
          CG GUGGUG  GGUGGUU CG
miRNA  3' GUCAUA  A          AUAU          G  5'
```

dataset: 1

target: OL672836.1

length: 29684

miRNA : 5008c

length: 30

mfe: -31.3 kcal/mol  
p-value: 1.000000e+00

position 11050

```
target 5' U          GGUA          U          UU  A 3'
          GCUAUG  UUAUUGCUAUG CUGCU  UGC
          CGAUAC  AGUGGUGAUAU GGUGG  GCG
miRNA  3' GU          G          UU          5'
```

dataset: 1

target: OL672836.1

length: 29684

miRNA : 5008c

length: 30

mfe: -31.2 kcal/mol  
p-value: 1.000000e+00

position 13162

```
target 5' U   G   A   UGU GU           U   C 3'
          GGU GUGC UCG   U   CUGUACUGCCG UGC
          UCG UACG AGU   G   GAUAUGGUGGU GCG
miRNA  3' G   A           GU           U   5'
```

-----

```
dataset: 1
target: OL672836.1
length: 29684
miRNA : 5008c
length: 30
```

```
mfe: -31.1 kcal/mol
p-value: 1.000000e+00
```

```
position 1124
target 5' C           G       AAUGA   A       AUG   C 3'
          CAGU  UGC UCACCA       AUGC ACCAA   UGC
          GUCC  ACG AGUGGU       UAUG UGGUU   GCG
miRNA  3'           AU           GA           G           5'
```

-----

```
dataset: 1
target: OL672836.1
length: 29684
miRNA : 5008c
length: 30
```

```
mfe: -31.1 kcal/mol
p-value: 1.000000e+00
```

```
position 2811
target 5' A   AAA  A           UG   UG  G  G   U 3'
          AGU   UG GUUCGCC  UGU  UG CA AUGC
          UCG   AU CGAGUGG  AUA  GU GU UGCG
miRNA  3' G           A           UG   UG  G           5'
```

-----

```
dataset: 1
target: OL672836.1
length: 29684
miRNA : 5008c
length: 30
```

```
mfe: -30.9 kcal/mol
p-value: 1.000000e+00
```

```
position 18167
target 5' A   A   G       ACAUGUU       C   A 3'
          AGUU AUG UUACC CUA       UAUCACC GCG
          UCGA UAC AGUGG GAU       AUGGUGG UGC
miRNA  3' G           G   U           U   G 5'
```

-----

```

dataset: 1
target: OL672836.1
length: 29684
miRNA : 5008c
length: 30

mfe: -30.9 kcal/mol
p-value: 1.000000e+00

position 25178
target 5' A A UG UG G G U 3'
        CA UUAUGCUU C UAU ACCA U UGC
        GU GAUACGAG G AUA UGGU G GCG
miRNA 3' C UG UG G UU 5'

```

---

## BA.2 top 25 for tDR-Val

```

Version: RNAhybrid 2.2
Command line:/vol/bioapps/bin/RNAhybrid.bin -t
/var/bibiserv2/anonymous/rnahybrid/28/15/12/bibiserv2_2022-06-
28_151239_34y4j/rnahybrid_input_target_rna_sequences_.file -m 29780 -n 31 -b
25 -s 3utr_human -q
/var/bibiserv2/anonymous/rnahybrid/28/15/12/bibiserv2_2022-06-
28_151239_34y4j/rnahybrid_input_mirna_sequences.file
searching
dataset: 1
mde of 5027: -64.200005
Individual hits

```

---

```

dataset: 1
target: ON024493.1
length: 29780
miRNA : 5027
length: 31

mfe: -31.0 kcal/mol
p-value: 1.000000e+00

position 6133
target 5' G GAUUAUAA A 3'
        GUG AUGUGGUGGCUAUU ACACUAC
        CGC UGCACUAUUGGUGA UGUGAUG
miRNA 3' U CCUUUG 5'

```

---

```

dataset: 1
target: ON024493.1
length: 29780

```

miRNA : 5027  
length: 31

mfe: -30.5 kcal/mol  
p-value: 1.000000e+00

position 5482  
target 5' U UGUA AAA UG G A A C A 3'  
UGAACGUGGUG ACU UG AC AC G AGAC  
GCUUGCACUAU UGG AU UG UG C UUUG  
miRNA 3' C UG G A C 5'

---

dataset: 1  
target: ON024493.1  
length: 29780  
miRNA : 5027  
length: 31

mfe: -30.0 kcal/mol  
p-value: 1.000000e+00

position 6428  
target 5' A U A CGAAG UG A 3'  
GUG AAUGUGA AACUAC U UA GGAGAC  
CGC UUGCACU UUGGUG G AU CCUUUG  
miRNA 3' A AU UG G 5'

---

dataset: 1  
target: ON024493.1  
length: 29780  
miRNA : 5027  
length: 31

mfe: -29.9 kcal/mol  
p-value: 1.000000e+00

position 29210  
target 5' C G U A U C 3'  
G GAACGUGG UGACC UACAC GG GC  
C CUUGCACU AUUGG AUGUG CC UG  
miRNA 3' G UG AUG UU 5'

---

dataset: 1  
target: ON024493.1  
length: 29780  
miRNA : 5027  
length: 31

mfe: -29.6 kcal/mol  
p-value: 1.000000e+00



position 12203  
target 5' U C CA GCA GUAAGU A 3'  
UGA CGUGAUG GCCAU AC UGGAAA  
GCU GCACUAU UGGUG UG GCCUUU  
miRNA 3' C U AUG AU G 5'

---

dataset: 1  
target: ON024493.1  
length: 29780  
miRNA : 5027  
length: 31

mfe: -29.3 kcal/mol  
p-value: 1.000000e+00

position 10092  
target 5' U CA UA UCUUU U 3'  
UGUGGUA ACUACACU ACGG GGC  
GCACUAU UGAUGUGA UGCC UUG  
miRNA 3' CGCUU UGG U 5'

---

dataset: 1  
target: ON024493.1  
length: 29780  
miRNA : 5027  
length: 31

mfe: -29.2 kcal/mol  
p-value: 1.000000e+00

position 10643  
target 5' U U UGUA UG UAUAA A 3'  
AGC UGGU CGCUGC U AUGGAGAC  
UUG ACUA GUGAUG A UGCCUUUG  
miRNA 3' CGC C UUG UG 5'

---

dataset: 1  
target: ON024493.1  
length: 29780  
miRNA : 5027  
length: 31

mfe: -29.0 kcal/mol  
p-value: 1.000000e+00

position 1432  
target 5' C A G CGC UU U 3'  
GU AG GUGGU ACUAUUGC CU GGAGGC  
CG UU CACUA UGGUGAUG GA CCUUUG  
miRNA 3' C G U U UG 5'

-----  
dataset: 1  
target: ON024493.1  
length: 29780  
miRNA : 5027  
length: 31

mfe: -29.0 kcal/mol  
p-value: 1.000000e+00

position 8755  
target 5' A C GG AG AU CAA U 3'  
GC AGCGUGGU U UUAUACUA GA AGC  
CG UUGCACUA G GAUGUGAU CU UUG  
miRNA 3' C UU GU GC 5'

-----  
dataset: 1  
target: ON024493.1  
length: 29780  
miRNA : 5027  
length: 31

mfe: -29.0 kcal/mol  
p-value: 1.000000e+00

position 29053  
target 5' G A GA AACCCAA U 3'  
GC GACGUGGU CCA ACA GGAAAU  
CG UUGCACUA GGU UGU CCUUUG  
miRNA 3' C UU GA GAUG 5'

-----  
dataset: 1  
target: ON024493.1  
length: 29780  
miRNA : 5027  
length: 31

mfe: -28.8 kcal/mol  
p-value: 1.000000e+00

position 628  
target 5' G A G C 3'  
GAGC UGGUGGCCAU G UACGG  
CUUG ACUAUUGGUG U AUGCC  
miRNA 3' CG C AUG G UUUG 5'

-----  
dataset: 1  
target: ON024493.1  
length: 29780  
miRNA : 5027

length: 31

mfe: -28.7 kcal/mol  
p-value: 1.000000e+00

position 6341  
target 5' A G A C 3'  
G GAAUG GAUAAUC UUGC CUGCG AGAU  
C CUUGC CUAUUGG GAUG GAUGC UUUG  
miRNA 3' G A U U C 5'

dataset: 1  
target: ON024493.1  
length: 29780  
miRNA : 5027  
length: 31

mfe: -28.6 kcal/mol  
p-value: 1.000000e+00

position 4133  
target 5' C UAU U AAAAAGGCUAGUG U G 3'  
UGUGGU ACC ACU GCACUAC GAAAU  
GCACUA UGG UGA UGUGAUG CUUUG  
miRNA 3' CGCUU U C 5'

dataset: 1  
target: ON024493.1  
length: 29780  
miRNA : 5027  
length: 31

mfe: -28.4 kcal/mol  
p-value: 1.000000e+00

position 27030  
target 5' C UAGCAG CAGGUUUU AUACAGUC A UU A 3'  
GC AGCGUG GUGACU GCUGC GCUAC GGA GGC  
CG UUGCAC UAUUGG UGAUG UGAUG CCU UUG  
miRNA 3' C 5'

dataset: 1  
target: ON024493.1  
length: 29780  
miRNA : 5027  
length: 31

mfe: -28.0 kcal/mol  
p-value: 1.000000e+00

position 2221

```
target 5' G      AAAU UC      UG      AA      U 3'
          GUGGAC      UG      ACC      UGCA      GGAAAU
          CGCUUG      AC      UGG      AUGU      CCUUUG
miRNA 3'      C      UAU      UG      GAUG      5'
```

-----

```
dataset: 1
target: ON024493.1
length: 29780
miRNA : 5027
length: 31
```

```
mfe: -27.8 kcal/mol
p-value: 1.000000e+00
```

```
position 8675
target 5' U      UG      CGUGACAUU      U      A      U      U 3'
          UGA      GUGGUG      UCACU      GCA      CUAC      GA      AC
          GCU      CACUAU      GGUGA      UGU      GAUG      CU      UG
miRNA 3' C      UG      U      C      U      5'
```

-----

```
dataset: 1
target: ON024493.1
length: 29780
miRNA : 5027
length: 31
```

```
mfe: -27.7 kcal/mol
p-value: 1.000000e+00
```

```
position 28549
target 5' A      UG      UU      C 3'
          GA      GU      AU      CUACUAC      CUA      GGAA
          CU      CA      UA      GGUGAUG      GAU      CCUU
miRNA 3' CG      UG      C      UU      U      G      UG 5'
```

-----

```
dataset: 1
target: ON024493.1
length: 29780
miRNA : 5027
length: 31
```

```
mfe: -27.7 kcal/mol
p-value: 1.000000e+00
```

```
position 17123
target 5' A      UU      UCUCAU      GUUGAU      U      A 3'
          GC      GC      GCCGCU      GCACUAUG      GAGA
          CG      UG      UGGUGA      UGUGAUGC      CUUU
miRNA 3'      CU      CACUAU      G 5'
```

-----

dataset: 1  
target: ON024493.1  
length: 29780  
miRNA : 5027  
length: 31

mfe: -27.7 kcal/mol  
p-value: 1.000000e+00

position 19809  
target 5' U GG ACAUU A UGAUC CU A 3'  
UG UGUGG GCUGCU AUACUG UGGGA AC  
GC GCACU UGGUGA UGUGAU GCCUU UG  
miRNA 3' C UU AU 5'

dataset: 1  
target: ON024493.1  
length: 29780  
miRNA : 5027  
length: 31

mfe: -27.7 kcal/mol  
p-value: 1.000000e+00

position 751  
target 5' C ACUCAU GCU GGAGGGGCAUA UC A 3'  
GUGA GCGUGA UAAC CACU CGCUAUG GAU  
CGCU UGCACU AUUG GUGA GUGAUGC UUG  
miRNA 3' U CU 5'

dataset: 1  
target: ON024493.1  
length: 29780  
miRNA : 5027  
length: 31

mfe: -27.6 kcal/mol  
p-value: 1.000000e+00

position 25888  
target 5' C A CU GAUUGGUGG GAAAA C 3'  
UGAAC UGA ACCA UUAUACU AUGGGAAU  
GCUUG ACU UGGU GAUGUGA UGCCUUUG  
miRNA 3' C C AU 5'

dataset: 1  
target: ON024493.1  
length: 29780  
miRNA : 5027  
length: 31

mfe: -27.4 kcal/mol  
p-value: 1.000000e+00

position 3494  
target 5' U C AUA UAAU C 3'  
UGAAU UGAUGAUUAC GCUAC GGA  
GCUUG ACUAUUGGUG UGAUG CCU  
miRNA 3' C C AUG UUG 5'

---

dataset: 1  
target: ON024493.1  
length: 29780  
miRNA : 5027  
length: 31

mfe: -27.4 kcal/mol  
p-value: 1.000000e+00

position 29661  
target 5' A U AAG CACAUUUUCACC AGUGAACAAU G G 3'  
GGAC UGA AGCCAC UAC GCUA GGAGA  
CUUG ACU UUGGUG AUG UGAU CCUUU  
miRNA 3' CG C A G G 5'

---

dataset: 1  
target: ON024493.1  
length: 29780  
miRNA : 5027  
length: 31

mfe: -27.4 kcal/mol  
p-value: 1.000000e+00

position 4565  
target 5' A ACUCU UACAAU UG U A 3'  
UGAA UGU GCCACU GCUAUG AAC  
GCUU GCA UGGUGA UGAUGC UUG  
miRNA 3' C CUAU UG CU 5'

---

dataset: 1  
target: ON024493.1  
length: 29780  
miRNA : 5027  
length: 31

mfe: -27.3 kcal/mol  
p-value: 1.000000e+00

position 310  
target 5' C CUCG GUG UU U 3'

```

          GCG ACGUG      UAC   GCU  GGAGAC
          CGC UGCAC      GUG   UGA  CCUUUG
miRNA  3'      U      UAUUG
AUG    UG          5'

```

## -----

### Top 50 for BA.2 tDR-Gly

Version: RNAhybrid 2.2

Command line: /vol/bioapps/bin/RNAhybrid.bin -t

/var/bibiserv2/anonymous/rnahybrid/28/15/51/bibiserv2\_2022-06-

28\_155132\_ofCoo/rnahybrid\_input\_target\_rna\_sequences\_.file -s 3utr\_human -b

50 -q /var/bibiserv2/anonymous/rnahybrid/28/15/51/bibiserv2\_2022-06-

28\_155132\_ofCoo/rnahybrid\_input\_mirna\_sequences.file -n 30 -m 29780

searching

dataset: 1

mde of 5008c: -65.000008

Individual hits

-----

dataset: 1

target: ON024493.1

length: 29780

miRNA : 5008c

length: 30

mfe: -35.7 kcal/mol

p-value: 1.000000e+00

position 1461

```

target 5' A          GUUCUCUUAUGUUGG          AACAAG          UAUUGGGUCCACGU          U
3'

```

```

          GGCUGUGU          UUGCCAU          UGUGCC          GCUAGCGC
          UCGAUACG          AGUGGUG          AUAUGG          UGGUUGCG

```

miRNA 3' G

5'

-----

dataset: 1

target: ON024493.1

length: 29780

miRNA : 5008c

length: 30

mfe: -35.3 kcal/mol

p-value: 1.000000e+00

position 10372

```

target 5' U          UGUUACAAUG          U          GUGU          G 3'

```

```

          UAGCU          GUUCACCA CUG          UUACCAAUGU
          GUCGA          CGAGUGGU GAU          GGUGGUUGCG

```

miRNA 3'

UA

AU

5'

-----

dataset: 1

target: ON024493.1  
length: 29780  
miRNA : 5008c  
length: 30

mfe: -35.2 kcal/mol  
p-value: 1.000000e+00

position 17121  
target 5' A GUU A 3'  
CAGCU UGCUC UCAU GCCGCU GAUGC  
GUCCA ACGAG GGUG UGGUGG UUGCG  
miRNA 3' U U AUA 5'

dataset: 1  
target: ON024493.1  
length: 29780  
miRNA : 5008c  
length: 30

mfe: -33.0 kcal/mol  
p-value: 1.000000e+00

position 14540  
target 5' U A UCUGGUAUAUC GAUAA A 3'  
GCUAUGC CGCUGCU UAUUACUA ACGC  
CGAUACG GUGGUGA AUGGUGGU UGCG  
miRNA 3' GU A U 5'

dataset: 1  
target: ON024493.1  
length: 29780  
miRNA : 5008c  
length: 30

mfe: -32.9 kcal/mol  
p-value: 1.000000e+00

position 13726  
target 5' A GAC G A GU C 3'  
CGGU AUG UACCAC UAUUACAC CAACGU  
GUCC UAC GUGGUG AUAUGGUG GUUGCG  
miRNA 3' A GA 5'

dataset: 1  
target: ON024493.1  
length: 29780  
miRNA : 5008c  
length: 30

mfe: -32.7 kcal/mol



p-value: 1.000000e+00

position 17399

```
target 5' U   GACCC   AU           UG  CC   A 3'
          GGC      UGCUCA   UACC  CA  ACGC
          UCG      ACGAGU   AUGG  GU  UGCG
miRNA  3' G   AU           GGUGAU   UG           5'
```

dataset: 1

target: ON024493.1

length: 29780

miRNA : 5008c

length: 30

mfe: -32.5 kcal/mol

p-value: 1.000000e+00

position 28377

```
target 5' U   GUCUUG           CUC  U  A  UG  A 3'
          GC      GUUCACCGCU   AC  CA  CA  GC
          CG      CGAGUGGUGA   UG  GU  GU  CG
miRNA  3' GU  AUA           UA           G  UG           5'
```

dataset: 1

target: ON024493.1

length: 29780

miRNA : 5008c

length: 30

mfe: -32.4 kcal/mol

p-value: 1.000000e+00

position 29463

```
target 5' G   C   G   CAACUCAGGCCUAA   CAUGCAG   A   G   A 3'
          AGC  GUGCU  ACU           ACU           ACCAC  CAA  GC
          UCG  UACGA  UGG           UGA           UGGUG  GUU  CG
miRNA  3' G   A   G           UA           G           5'
```

dataset: 1

target: ON024493.1

length: 29780

miRNA : 5008c

length: 30

mfe: -32.3 kcal/mol

p-value: 1.000000e+00

position 24183

```
target 5' U   GCAG   G   AA           UGCU   A 3'
          GGU      GUGCU  CAUUAC  AUACCAUU  AUGC
          UCG      UACGA  GUGGUG  UAUGGUGG  UGCG
```

miRNA 3' G A A U 5'

dataset: 1  
target: ON024493.1  
length: 29780  
miRNA : 5008c  
length: 30

mfe: -32.0 kcal/mol  
p-value: 1.000000e+00

position 4654  
target 5' C CAGUUUC UUCU UG GUUA A 3'  
CAGCUA UGU UCACC AUGCU CAGCGU  
GUUGAU ACG AGUGG UAUGG GUUGCG  
miRNA 3' UGA UG 5'

dataset: 1  
target: ON024493.1  
length: 29780  
miRNA : 5008c  
length: 30

mfe: -32.0 kcal/mol  
p-value: 1.000000e+00

position 4154  
target 5' A GG AAA A 3'  
GGCUA GU CACUACUG UGCUAGCG  
UCGAU CG GUGGUGAU GUGGUUGC  
miRNA 3' G A A AUG G 5'

dataset: 1  
target: ON024493.1  
length: 29780  
miRNA : 5008c  
length: 30

mfe: -32.0 kcal/mol  
p-value: 1.000000e+00

position 26757  
target 5' U CUUCAU UUCAG U UG GU G 3'  
CAGCUA UGCUU CU ACUG U CGC ACGC  
GUUGAU ACGAG GG UGAU A GUG UGCG  
miRNA 3' U UG GU 5'

dataset: 1  
target: ON024493.1

length: 29780  
miRNA : 5008c  
length: 30

mfe: -31.7 kcal/mol  
p-value: 1.000000e+00

position 16893  
target 5' A A CAUUAAGUG UAC G AAGA A 3'  
CAGU AUGC CACC ACUA UGCCAC GC  
GU CG UACG GUGG UGAU AUGGUG CG  
miRNA 3' A A GUUG 5'

---

dataset: 1  
target: ON024493.1  
length: 29780  
miRNA : 5008c  
length: 30

mfe: -31.6 kcal/mol  
p-value: 1.000000e+00

position 1292  
target 5' A AAG UGUGGUUACU AA U 3'  
AG GUGC CACUACU UACC CCA AUGC  
UC UACG GUGGUGA AUGG GGU UGCG  
miRNA 3' G GA A U U 5'

---

dataset: 1  
target: ON024493.1  
length: 29780  
miRNA : 5008c  
length: 30

mfe: -31.6 kcal/mol  
p-value: 1.000000e+00

position 29131  
target 5' U C AAA UG AAUU C U 3'  
GGC GC U CAC UGCC CCAGCGC  
UCG CG G GUG AUGG GGUUGCG  
miRNA 3' G AUA A UG AU U 5'

---

dataset: 1  
target: ON024493.1  
length: 29780  
miRNA : 5008c  
length: 30

mfe: -31.5 kcal/mol  
p-value: 1.000000e+00

position 26951  
target 5' C UGACAUCAAGGACC CUAAGAAA GUU C G U 3'  
GCUG UGC UCACU GCUA AUCAC AACGC  
CGAU ACG AGUGG UGAU UGGUG UUGCG  
miRNA 3' GU A G 5'

---

dataset: 1  
target: ON024493.1  
length: 29780  
miRNA : 5008c  
length: 30

mfe: -31.5 kcal/mol  
p-value: 1.000000e+00

position 14755  
target 5' U G UA G CGUUAUAAU A 3'  
CAGC AU U ACUACUAU CUACCAAC  
GUCG UA A UGGUGAUA GGUGGUUG  
miRNA 3' A CG G U CG 5'

---

dataset: 1  
target: ON024493.1  
length: 29780  
miRNA : 5008c  
length: 30

mfe: -31.4 kcal/mol  
p-value: 1.000000e+00

position 16171  
target 5' A ACA AGU UAC G U 3'  
GGCUAUGU CACCGC AUAC CU A GC  
UCGAUACG GUGGUG UAUG GG U CG  
miRNA 3' G A A GU U G 5'

---

dataset: 1  
target: ON024493.1  
length: 29780  
miRNA : 5008c  
length: 30

mfe: -31.3 kcal/mol  
p-value: 1.000000e+00

position 11082  
target 5' U GGUA U UU A 3'  
GCUAUG UUAUUGCUAUG CUGCU UGC  
CGAUAC AGUGGUGAUAU GGUGG GCG  
miRNA 3' GU G UU 5'

-----  
dataset: 1  
target: ON024493.1  
length: 29780  
miRNA : 5008c  
length: 30

mfe: -31.2 kcal/mol  
p-value: 1.000000e+00

position 13194  
target 5' U G A UGU GU U C 3'  
GGU GUGC UCG U CUGUACUGCCG UGC  
UCG UACG AGU G GAUAUGGUGGU GCG  
miRNA 3' G A GU U 5'

-----  
dataset: 1  
target: ON024493.1  
length: 29780  
miRNA : 5008c  
length: 30

mfe: -31.1 kcal/mol  
p-value: 1.000000e+00

position 1153  
target 5' C G AAUGA A AUG C 3'  
CAGU UGC UCACCA AUGC ACCAA UGC  
GUCG ACG AGUGGU UAUG UGGUU GCG  
miRNA 3' AU GA G 5'

-----  
dataset: 1  
target: ON024493.1  
length: 29780  
miRNA : 5008c  
length: 30

mfe: -31.1 kcal/mol  
p-value: 1.000000e+00

position 2840  
target 5' A AAA A UG UG G G U 3'  
AGU UG GUUCGCC UGU UG CA AUGC  
UCG AU CGAGUGG AUA GU GU UGCG  
miRNA 3' G A UG UG G 5'

-----  
dataset: 1  
target: ON024493.1  
length: 29780

miRNA : 5008c  
length: 30

mfe: -30.9 kcal/mol  
p-value: 1.000000e+00

position 18199  
target 5' A A G ACAUGUU C A 3'  
AGUU AUG UUACC CUA UAUCACC GCG  
UCGA UAC AGUGG GAU AUGGUGG UGC  
miRNA 3' G G U U G 5'

---

dataset: 1  
target: ON024493.1  
length: 29780  
miRNA : 5008c  
length: 30

mfe: -30.9 kcal/mol  
p-value: 1.000000e+00

position 25210  
target 5' A A UG UG G G U 3'  
CA UUAUGCUU C UAU ACCA U UGC  
GU GAUACGAG G AUA UGGU G GCG  
miRNA 3' C UG UG G UU 5'

---

dataset: 1  
target: ON024493.1  
length: 29780  
miRNA : 5008c  
length: 30

mfe: -30.9 kcal/mol  
p-value: 1.000000e+00

position 13037  
target 5' U U UG UG GA A U 3'  
CUGUGC UU C UA UGCUGCUAA GC  
GAUACG AG G AU AUGGUGGUU CG  
miRNA 3' GUC UG UG G 5'

---

dataset: 1  
target: ON024493.1  
length: 29780  
miRNA : 5008c  
length: 30

mfe: -30.7 kcal/mol  
p-value: 1.000000e+00

position 15990  
target 5' U UAGA C AAACAUCCUA GGAGU U 3'  
UAGCUA UGCUUACC ACU UACU AUCA AUGC  
GU CGAU ACGAGUGG UGA AUGG UGGU UGCG  
miRNA 3' U 5'

-----  
dataset: 1  
target: ON024493.1  
length: 29780  
miRNA : 5008c  
length: 30

mfe: -30.6 kcal/mol  
p-value: 1.000000e+00

position 13373  
target 5' G A ACU GAACCC UCAGUCA A 3'  
UAGUUGUG UCA CCGC AUGCU GCUGAUGC  
GU CGAUAC AGU GGUG UAUGG UGGUUGCG  
miRNA 3' G A 5'

-----  
dataset: 1  
target: ON024493.1  
length: 29780  
miRNA : 5008c  
length: 30

mfe: -30.6 kcal/mol  
p-value: 1.000000e+00

position 12393  
target 5' U CCUUGAA A UCUUA A A 3'  
GGUUGUGUUC CAU AUACC CAAC GC  
UCGAUACGAG GUG UAUGG GUUG CG  
miRNA 3' G UG A UG 5'

-----  
dataset: 1  
target: ON024493.1  
length: 29780  
miRNA : 5008c  
length: 30

mfe: -30.6 kcal/mol  
p-value: 1.000000e+00

position 16118  
target 5' U AUG A UU G A 3'  
GUUAUGCUUACUA AUA CAC CAA GU  
CGAUACGAGUGGU UAU GUG GUU CG  
miRNA 3' GU GA G G 5'

-----  
dataset: 1  
target: ON024493.1  
length: 29780  
miRNA : 5008c  
length: 30

mfe: -30.6 kcal/mol  
p-value: 1.000000e+00

position 26654  
target 5' C AACUUUAACUUGUUU UU AGAAUAAAUUGGAU GG G 3'  
CAGU UGUGCUUGCUGCUGU AC CACC UG  
GUCG AUACGAGUGGUGAUA UG GUGG GC  
miRNA 3' UU G 5'

-----  
dataset: 1  
target: ON024493.1  
length: 29780  
miRNA : 5008c  
length: 30

mfe: -30.3 kcal/mol  
p-value: 1.000000e+00

position 12318  
target 5' G A A U UAGAAAGUUGGAUAA A 3'  
CAG C AUGCUU UCACUAUGCU UGAUGC  
GUC G UACGAG GGUGAUAUGG GUUGCG  
miRNA 3' A U UG 5'

-----  
dataset: 1  
target: ON024493.1  
length: 29780  
miRNA : 5008c  
length: 30

mfe: -30.3 kcal/mol  
p-value: 1.000000e+00

position 1986  
target 5' U UGA AU AUUUG A 3'  
GCUA UGUUCAC CUG GCUACUAC  
CGAU ACGAGUG GAU UGGUGGUUG  
miRNA 3' GU GU A CG 5'

-----  
dataset: 1  
target: ON024493.1  
length: 29780  
miRNA : 5008c



length: 30

mfe: -30.2 kcal/mol  
p-value: 1.000000e+00

position 15075  
target 5' G G U U UG A AUG A 3'  
UAGCUG UG CUC AUC U GUACU ACCAAU  
GU CGAU AC GAG UGG A UAUGG UGGUUG  
miRNA 3' UG CG 5'

---

dataset: 1  
target: ON024493.1  
length: 29780  
miRNA : 5008c  
length: 30

mfe: -30.0 kcal/mol  
p-value: 1.000000e+00

position 4575  
target 5' U CAA UG UA A UG U 3'  
GUUA UGC CACU GCUAUG AC CA GC  
CGAU ACG GUGG UGAUUA UG GU CG  
miRNA 3' GU A GG UG 5'

---

dataset: 1  
target: ON024493.1  
length: 29780  
miRNA : 5008c  
length: 30

mfe: -30.0 kcal/mol  
p-value: 1.000000e+00

position 11400  
target 5' U A UAGAUCAA U GU G U 3'  
GGU AUGCUU GCCAUU CCAU G GC  
UCG UACGAG UGGUGA GGUG U CG  
miRNA 3' G A UAU GU G 5'

---

dataset: 1  
target: ON024493.1  
length: 29780  
miRNA : 5008c  
length: 30

mfe: -29.9 kcal/mol  
p-value: 1.000000e+00

position 9326

```
target 5'      A      UA      AUUCA  U  GG  U 3'
           UAUGUU  CACCACUA      ACC AUU  UGC
           AUACGA  GUGGUGAU      UGG UGG  GCG
miRNA  3' GUCG                        A      UU      5'
```

---

```
dataset: 1
target: ON024493.1
length: 29780
miRNA : 5008c
length: 30
```

```
mfe: -29.9 kcal/mol
p-value: 1.000000e+00
```

```
position 435
target 5' A      CCUA      AACGUUCGG      G  U  A 3'
           CAGC  UGUGUUCAUCA      AUGCU C AAC GC
           GUCG  AUACGAGUGGU      UAUGG G UUG CG
miRNA  3'                        GA      U G      5'
```

---

```
dataset: 1
target: ON024493.1
length: 29780
miRNA : 5008c
length: 30
```

```
mfe: -29.8 kcal/mol
p-value: 1.000000e+00
```

```
position 15435
target 5' C  G  GAAC      GGAG      U  U 3'
           CAG UG  CUCAUCA  AUGCCAC AAC GC
           GUC AU  GAGUGGU  UAUGGUG UUG CG
miRNA  3'      G  AC      GA      G      5'
```

---

```
dataset: 1
target: ON024493.1
length: 29780
miRNA : 5008c
length: 30
```

```
mfe: -29.8 kcal/mol
p-value: 1.000000e+00
```

```
position 24079
target 5' A      UAACG C      U      UU  U 3'
           AGUU  G CUUACUGUU UGCCACC  UGC
           UCGA  C GAGUGGUGA AUGGUGG  GCG
miRNA  3' G      UA      U      UU      5'
```

---

dataset: 1  
target: ON024493.1  
length: 29780  
miRNA : 5008c  
length: 30

mfe: -29.7 kcal/mol  
p-value: 1.000000e+00

position 23578  
target 5' G GUCAAUCCAUCAU CUA U GG A 3'  
UAGCUA UGC CACUAUGUCAC U UGC  
GU CGAU ACG GUGAUAUGGUG G GCG  
miRNA 3' AGUG UU 5'

---

dataset: 1  
target: ON024493.1  
length: 29780  
miRNA : 5008c  
length: 30

mfe: -29.7 kcal/mol  
p-value: 1.000000e+00

position 26281  
target 5' U A U UUACU U 3'  
GCUA GUU CACUA GCCA CC GCGC  
CGAU CGA GUGAU UGGU GG UGCG  
miRNA 3' GU A GUG A U 5'

---

dataset: 1  
target: ON024493.1  
length: 29780  
miRNA : 5008c  
length: 30

mfe: -29.7 kcal/mol  
p-value: 1.000000e+00

position 64  
target 5' U CA G UUAGUG C A 3'  
GGCUGU CUC GCUGC AUGC CACU ACGC  
UCGAUA GAG UGGUG UAUG GUGG UGCG  
miRNA 3' G C A U 5'

---

dataset: 1  
target: ON024493.1  
length: 29780  
miRNA : 5008c  
length: 30

mfe: -29.6 kcal/mol  
p-value: 1.000000e+00

position 26121  
target 5' C AAUGGAACCAAUU AUGA G GACG G 3'  
CAGU UAUG ACC AC ACUACUAGCGU  
GUCC AUAC UGG UG UGGUGGUUGCG  
miRNA 3' GAG AUA 5'

---

dataset: 1  
target: ON024493.1  
length: 29780  
miRNA : 5008c  
length: 30

mfe: -29.6 kcal/mol  
p-value: 1.000000e+00

position 18814  
target 5' C AUGCAA G GGUGUCUAGCUGU G U 3'  
UAGUUGUG UCAU ACUA CCAC AGUGC  
GUCCAUAC AGUG UGAU GGUG UUGCG  
miRNA 3' G G AU G 5'

---

dataset: 1  
target: ON024493.1  
length: 29780  
miRNA : 5008c  
length: 30

mfe: -29.5 kcal/mol  
p-value: 1.000000e+00

position 3688  
target 5' U GGUAUUUUUG G AUU UUAAGA U 3'  
CAGCU GUGCU ACC CUAUAC CU GU  
GUCCG UACGA UGG GAUAUG GG CG  
miRNA 3' G U GU UUG 5'

---

dataset: 1  
target: ON024493.1  
length: 29780  
miRNA : 5008c  
length: 30

mfe: -29.4 kcal/mol  
p-value: 1.000000e+00

position 9626  
target 5' U A UUA UUUCUGGAUAA U U 3'

```

          GGUUAUGUUCAC C CU   GUACC          CAA UGC
          UCGAUACGAGUG G GA   UAUGG          GUU GCG
miRNA  3' G               U           UG               5'

```

---

```

dataset: 1
target: ON024493.1
length: 29780
miRNA : 5008c
length: 30

```

```

mfe: -29.4 kcal/mol
p-value: 1.000000e+00

```

```

position 17075
target 5' U   UGGCCUA   U   CCCU   UG U   A 3'
          GCUAU   GCUC CUACUA   UC C CGC
          CGAUA   CGAG GGUGAU   GG G GCG
miRNA  3' GU               U   AU   UG UU   5'

```

---

```

dataset: 1
target: ON024493.1
length: 29780
miRNA : 5008c
length: 30

```

```

mfe: -29.4 kcal/mol
p-value: 1.000000e+00

```

```

position 2803
target 5' G AA   UG   AGU G   U 3'
          AG GUGCUC C CUAUAC   U AAC
          UC UACGAG G GAUAUG   G UUG
miRNA  3' G GA   UG U   GU G   CG 5'

```

---

```

dataset: 1
target: ON024493.1
length: 29780
miRNA : 5008c
length: 30

```

```

mfe: -29.4 kcal/mol
p-value: 1.000000e+00

```

```

position 10727
target 5' U   AAG   A   GA   U   A 3'
          GGCUAUG   UAC AUUAU   ACC CUAAC
          UCGAUAC   GUG UGAUA   UGG GGUUG
miRNA  3' G   GA   G   U   CG 5'

```

---

dataset: 1  
target: ON024493.1  
length: 29780  
miRNA : 5008c  
length: 30

mfe: -29.3 kcal/mol  
p-value: 1.000000e+00

position 12056  
target 5' A A C GAGUUUAGUU U U A 3'  
AGCUAU G CUCA CC CU CCAUCA AUGC  
UCGAUA C GAGU GG GA GGUGGU UGCG  
miRNA 3' G U UAU 5'

-----
